# Supplementary material
Source: PubMed Central journal article supplement (PMC7167899)
Supplement: PMIC-11-4477-s001.pdf [file PMIC-11-4477-s001.pdf]

# PROTEOMICS

## Supporting Information for Proteomics

**DOI 10.1002/pmic.201100224**

Mijke W. Vogels, Bas W. M. van Balkom, Albert J. R. Heck, Cornelis

A. M. de Haan, Peter J. M. Rottier, Joseph J. Batenburg,

Dora V. Kaloyanova and J. Bernd Helms

**Quantitative proteomic identification of host factors involved in the  
*Salmonella typhimurium* infection cycle**

**Table S1. List of identified proteins in a Golgi-enriched fraction of *Salmonella*-infected HeLa cells relative to mock-infected cells based on SILAC analysis.**

| Protein ID  | Protein                                                                | Gene Symbol | Mean Ratio <sup>a</sup> | Stdev (ratio) <sup>b</sup> | p-value |
|-------------|------------------------------------------------------------------------|-------------|-------------------------|----------------------------|---------|
| IPI00000005 | GTPase NRas precursor                                                  | NRAS        | 1.593                   | 0.345                      | 0.096   |
| IPI00000006 | HRas precursor                                                         | HRAS        | 1.275                   | 0.460                      | 0.553   |
| IPI00000041 | Rho-related GTP-binding protein RhoB precursor                         | RHOB        | 0.697                   | 0.068                      | 0.100   |
| IPI00000138 | Alpha-1,3-mannosyl-glycoprotein 2-beta-N-acetylglucosaminyltransferase | MGAT1       | 1.388                   | 0.440                      | 0.430   |
| IPI00000190 | CD81 antigen                                                           | CD81        | 1.161                   | 0.210                      | 0.474   |
| IPI00000494 | 60S ribosomal protein L5                                               | RPL5        | 0.757                   | 0.097                      | 0.176   |
| IPI00000643 | BAG family molecular chaperone regulator 2                             | BAG2        | 0.727                   | 0.079                      | 0.027   |
| IPI00000816 | 14-3-3 protein epsilon                                                 | YWHAE       | 0.939                   | 0.160                      | 0.574   |
| IPI00000856 | Isoform 1 of Pleckstrin homology domain-containing family C member 1   | PLEKHC1     | 1.859                   | 0.457                      | 0.083   |
| IPI00000861 | Isoform 1 of LIM and SH3 domain protein 1                              | LASP1       | 1.691                   | 0.539                      | 0.157   |
| IPI00000874 | Peroxiredoxin-1                                                        | PRDX1       | 0.904                   | 0.292                      | 0.627   |
| IPI00000875 | Elongation factor 1-gamma                                              | EEF1G       | 0.798                   | 0.301                      | 0.365   |
| IPI00000877 | 150 kDa oxygen-regulated protein precursor                             | HYOU1       | 0.812                   | 0.007                      | 0.017   |
| IPI00000948 | Transducin beta-like 2 protein                                         | TBL2        | 0.746                   | 0.324                      | 0.306   |
| IPI00001539 | 3-ketoacyl-CoA thiolase, mitochondrial                                 | ACAA2       | 1.036                   | 0.769                      | 0.957   |
| IPI00001560 | Isoform 1 of Cyclin-dependent kinase inhibitor 2A, isoforms 1/2/3      | CDKN2A      | 0.536                   | 0.025                      | 0.024   |
| IPI00001589 | Mitochondrial import inner membrane translocase subunit Tim13          | TIMM13      | 1.240                   | 0.837                      | 0.754   |
| IPI00001632 | Hypothetical protein LOC57648                                          | KIAA1522    | 1.556                   | 0.254                      | 0.199   |
| IPI00001639 | Importin beta-1 subunit                                                | KPNB1       | 0.666                   | 0.007                      | 0.000   |
| IPI00001871 | PRKC apoptosis WT1 regulator protein                                   | PAWR        | 1.760                   | 0.380                      | 0.074   |
| IPI00001893 | Isoform A of Protocadherin-7 precursor                                 | PCDH7       | 1.427                   | 0.318                      | 0.308   |
| IPI00001914 | Isoform 1 of FK506-binding protein 7 precursor                         | FKBP7       | 0.644                   | 0.058                      | 0.073   |
| IPI00001960 | Chloride intracellular channel protein 4                               | CLIC4       | 0.980                   | 0.128                      | 0.865   |
| IPI00002070 | Leucine-rich repeat-containing protein 8A                              | LRRRC8A     | 1.153                   | 0.182                      | 0.446   |
| IPI00002214 | Importin alpha-2 subunit                                               | KPNA2       | 0.746                   | 0.056                      | 0.099   |
| IPI00002349 | Nuclear fragile X mental retardation-interacting protein 2             | NUFIP2      | 0.775                   | 0.173                      | 0.317   |
| IPI00002406 | Lutheran blood group glycoprotein precursor                            | BCAM        | 1.340                   | 0.264                      | 0.156   |
| IPI00002412 | Palmitoyl-protein thioesterase 1 precursor                             | PPT1        | 1.442                   | 0.196                      | 0.060   |
| IPI00002459 | Annexin VI isoform 2                                                   | ANXA6       | 1.275                   | 0.384                      | 0.341   |

|             |                                                                                        |          |       |       |       |
|-------------|----------------------------------------------------------------------------------------|----------|-------|-------|-------|
| IPI00002460 | Isoform 1 of Annexin A7                                                                | ANXA7    | 1.125 | 0.149 | 0.284 |
| IPI00002483 | Zinc transporter 1                                                                     | SLC30A1  | 0.945 | 0.065 | 0.440 |
| IPI00002521 | ATP synthase coupling factor 6. mitochondrial precursor                                | ATP5J    | 1.555 | 1.088 | 0.602 |
| IPI00002525 | Neudesin precursor                                                                     | NENF     | 1.017 | 0.089 | 0.833 |
| IPI00002535 | FK506-binding protein 2 precursor                                                      | FKBP2    | 0.976 | 0.164 | 0.868 |
| IPI00002745 | Cathepsin Z precursor                                                                  | CTSZ     | 1.533 | 0.295 | 0.089 |
| IPI00002821 | 60S ribosomal protein L14                                                              | RPL14    | 0.867 | 0.050 | 0.166 |
| IPI00003128 | Isoform IIb of Prolyl 4-hydroxylase subunit alpha-2 precursor                          | P4HA2    | 1.054 | 0.391 | 0.877 |
| IPI00003348 | GNB2 Guanine nucleotide-binding protein G(I)/G(S)/G(T) subunit beta 2                  | GNB2     | 1.581 | 0.195 | 0.035 |
| IPI00003362 | HSPA5 protein                                                                          | HSPA5    | 0.889 | 0.098 | 0.188 |
| IPI00003406 | Drebrin                                                                                | DBN1     | 1.195 | 0.166 | 0.179 |
| IPI00003527 | Ezrin-radixin-moesin-binding phosphoprotein 50                                         | SLC9A3R1 | 1.000 | 0.030 | 0.992 |
| IPI00003856 | Vacuolar ATP synthase subunit E 1                                                      | ATP6V1E1 | 0.744 | 0.176 | 0.288 |
| IPI00003865 | Isoform 1 of Heat shock cognate 71 kDa protein                                         | HSPA8    | 0.877 | 0.082 | 0.122 |
| IPI00003918 | 60S ribosomal protein L4                                                               | RPL4     | 0.938 | 0.101 | 0.402 |
| IPI00003925 | Isoform 1 of Pyruvate dehydrogenase E1 component subunit beta. mitochondrial precursor | PDHB     | 1.113 | 0.913 | 0.889 |
| IPI00004397 | Ras-related protein Ra-B precursor                                                     | RALB     | 1.084 | 0.017 | 0.093 |
| IPI00004416 | Charged multivesicular body protein 2a                                                 | CHMP2A   | 0.569 | 0.170 | 0.173 |
| IPI00004503 | Lysosomal-associated membrane protein 1                                                | LAMP1    | 1.181 | 0.276 | 0.523 |
| IPI00004669 | Polypeptide N-acetylgalactosaminyltransferase 2                                        | GALNT2   | 1.520 | 0.321 | 0.107 |
| IPI00004671 | Golgin subfamily B member 1                                                            | GOLGB1   | 1.522 | 0.248 | 0.206 |
| IPI00004902 | Isoform 1 of Electron transfer flavoprotein subunit beta                               | ETFB     | 1.267 | 1.123 | 0.793 |
| IPI00004962 | Golgi phosphoprotein 4                                                                 | GOLPH4   | 1.875 | 0.374 | 0.056 |
| IPI00005087 | Tropomodulin-3                                                                         | TMOD3    | 0.938 | 0.092 | 0.365 |
| IPI00005129 | Isoform 1 of Secretory carrier-associated membrane protein 1                           | SCAMP1   | 0.991 | 0.259 | 0.969 |
| IPI00005159 | Actin-like protein 2                                                                   | ACTR2    | 1.287 | 0.243 | 0.177 |
| IPI00005160 | Actin-related protein 2/3 complex subunit 1B                                           | ARPC1B   | 1.257 | 0.139 | 0.233 |
| IPI00005162 | Actin-related protein 2/3 complex subunit 3                                            | ARPC3    | 1.412 | 0.221 | 0.084 |
| IPI00005202 | Membrane-associated progesterone receptor component 2                                  | PGRMC2   | 1.100 | 0.211 | 0.498 |
| IPI00005264 | Isoform 2 of Plakophilin-2                                                             | PKP2     | 1.460 | 0.426 | 0.369 |
| IPI00005537 | 39S ribosomal protein L12. mitochondrial precursor                                     | MRPL12   | 1.149 | 0.865 | 0.793 |
| IPI00005614 | Isoform Long of Spectrin beta chain. brain 1                                           | SPTBN1   | 1.313 | 0.286 | 0.199 |
| IPI00005719 | Isoform 1 of Ras-related protein Rab-1A                                                | RAB1A    | 1.150 | 0.302 | 0.481 |
| IPI00005740 | Neighbor of COX4                                                                       | COX4NB   | 0.904 | 0.102 | 0.410 |
| IPI00005745 | Serine palmitoyltransferase 1                                                          | SPTLC1   | 1.044 | 0.052 | 0.442 |

|             |                                                                              |          |       |       |       |
|-------------|------------------------------------------------------------------------------|----------|-------|-------|-------|
| IPI00005969 | F-actin capping protein subunit alpha-1                                      | CAPZA1   | 1.027 | 0.084 | 0.632 |
| IPI00005978 | Splicing factor, arginine/serine-rich 2                                      | SFRS2    | 0.916 | 0.063 | 0.310 |
| IPI00006034 | Cysteine-rich protein 2                                                      | CRIP2    | 1.489 | 0.062 | 0.005 |
| IPI00006052 | Prefoldin subunit 2                                                          | PFDN2    | 0.637 | 0.150 | 0.052 |
| IPI00006211 | Isoform 1 of Vesicle-associated membrane protein-associated protein B/C      | VAPB     | 1.205 | 0.071 | 0.154 |
| IPI00006362 | Isoform 2 of Endothelial differentiation-related factor 1                    | EDF1     | 0.973 | 0.201 | 0.879 |
| IPI00006482 | Isoform Long of Sodium/potassium-transporting ATPase alpha-1 chain precursor | ATP1A1   | 1.206 | 0.196 | 0.210 |
| IPI00006666 | Monocarboxylate transporter 4                                                | SLC16A3  | 1.213 | 0.142 | 0.122 |
| IPI00006865 | Vesicle-trafficking protein SEC22b                                           | SEC22B   | 1.143 | 0.232 | 0.398 |
| IPI00006932 | Isoform 1 of Putative RNA-binding protein Luc7-like 2                        | LUC7L2   | 1.027 | 0.456 | 0.946 |
| IPI00007001 | 39S ribosomal protein L11, mitochondrial precursor                           | MRPL11   | 1.235 | 1.012 | 0.798 |
| IPI00007034 | Isoform 2 of UBA domain-containing protein PHGDHL1 precursor                 | PHGDHL1  | 1.060 | 0.136 | 0.644 |
| IPI00007058 | Coronin-1B                                                                   | CORO1B   | 1.459 | 0.115 | 0.020 |
| IPI00007061 | Vesicle transport protein GOT1B                                              | GOLT1B   | 1.132 | 0.435 | 0.741 |
| IPI00007067 | C9orf19 Golgi-associated plant pathogenesis-related protein 1                | C9orf19  | 1.513 | 0.292 | 0.093 |
| IPI00007188 | ADP/ATP translocase 2                                                        | SLC25A5  | 1.700 | 1.434 | 0.615 |
| IPI00007289 | Alkaline phosphatase, placental type precursor                               | ALPP     | 2.658 | 1.381 | 0.339 |
| IPI00007611 | ATP synthase O subunit, mitochondrial precursor                              | ATP5O    | 1.567 | 1.231 | 0.632 |
| IPI00007675 | Cytoplasmic dynein 1 light intermediate chain 1                              | DYNC1L1  | 0.675 | 0.074 | 0.102 |
| IPI00007682 | Vacuolar ATP synthase catalytic subunit A                                    | ATP6V1A  | 0.789 | 0.125 | 0.252 |
| IPI00007750 | Tubulin alpha-1 chain                                                        | TUBA4A   | 0.463 | 0.264 | 0.072 |
| IPI00007752 | Tubulin beta-2C chain                                                        | TUBB2C   | 0.683 | 0.079 | 0.020 |
| IPI00007755 | Ras-related protein Rab-21                                                   | RAB21    | 1.297 | 0.092 | 0.030 |
| IPI00007764 | Isoform 1 of Hematological and neurological expressed 1 protein              | HN1      | 1.072 | 0.153 | 0.627 |
| IPI00007765 | Stress-70 protein, mitochondrial precursor                                   | HSPA9    | 0.963 | 0.766 | 0.941 |
| IPI00007812 | Vacuolar ATP synthase subunit B, brain isoform                               | ATP6V1B2 | 0.900 | 0.181 | 0.439 |
| IPI00007909 | Prenylated Rab acceptor protein 1                                            | RABAC1   | 1.631 | 0.636 | 0.394 |
| IPI00007935 | PDZ and LIM domain protein 5                                                 | PDLIM5   | 1.057 | 0.034 | 0.257 |
| IPI00007940 | SPFH domain-containing protein 1 precursor                                   | ERLIN1   | 1.033 | 0.198 | 0.800 |
| IPI00008085 | Solute carrier family 39 (Zinc transporter), member 10                       | SLC39A10 | 1.067 | 0.019 | 0.125 |
| IPI00008274 | Adenylyl cyclase-associated protein 1                                        | CAP1     | 0.664 | 0.288 | 0.347 |
| IPI00008338 | Isoform 2 of Multidrug resistance-associated protein 1                       | ABCC1    | 1.204 | 0.264 | 0.313 |
| IPI00008418 | Isoform 1 of Diablo homolog, mitochondrial precursor                         | DIABLO   | 1.093 | 0.336 | 0.763 |
| IPI00008433 | 40S ribosomal protein S5                                                     | RPS5     | 0.763 | 0.068 | 0.026 |
| IPI00008438 | 40S ribosomal protein S10                                                    | RPS10    | 0.721 | 0.187 | 0.123 |

|             |                                                                   |         |       |       |       |
|-------------|-------------------------------------------------------------------|---------|-------|-------|-------|
| IPI00008453 | Coronin-1C                                                        | CORO1C  | 1.199 | 0.159 | 0.162 |
| IPI00008454 | DnaJ homolog subfamily B member 11 precursor                      | DNAJB11 | 1.087 | 0.282 | 0.645 |
| IPI00008494 | Intercellular adhesion molecule 1 precursor                       | ICAM1   | 0.701 | 0.314 | 0.407 |
| IPI00008527 | 60S acidic ribosomal protein P1                                   | RPLP1   | 0.803 | 0.029 | 0.065 |
| IPI00008529 | 60S acidic ribosomal protein P2                                   | RPLP2   | 0.852 | 0.125 | 0.177 |
| IPI00008530 | 60S acidic ribosomal protein P0                                   | RPLP0   | 0.775 | 0.095 | 0.055 |
| IPI00008603 | Actin. aortic smooth muscle                                       | ACTA2   | 1.054 | 0.231 | 0.724 |
| IPI00008780 | Stanniocalcin-2 precursor                                         | STC2    | 0.215 | 0.022 | 0.013 |
| IPI00008918 | Isoform Beta of LIM domain and actin-binding protein 1            | LIMA1   | 1.441 | 0.387 | 0.354 |
| IPI00008964 | Ras-related protein Rab-1B                                        | RAB1B   | 1.192 | 0.531 | 0.700 |
| IPI00008986 | Large neutral amino acids transporter small subunit 1             | SLC7A5  | 1.253 | 0.167 | 0.120 |
| IPI00009057 | Isoform A of Ras GTPase-activating protein-binding protein 2      | G3BP2   | 0.828 | 0.402 | 0.653 |
| IPI00009111 | Trophoblast glycoprotein precursor                                | TPBG    | 1.051 | 0.354 | 0.825 |
| IPI00009225 | Syntaxin-8                                                        | STX8    | 0.890 | 0.189 | 0.561 |
| IPI00009235 | Translocon-associated protein subunit gamma                       | SSR3    | 0.792 | 0.019 | 0.040 |
| IPI00009236 | Isoform Alpha of Caveolin-1                                       | CAV1    | 1.255 | 0.328 | 0.311 |
| IPI00009244 | Adapter-related protein complex 1 sigma 1B subunit                | AP1S2   | 0.870 | 0.031 | 0.105 |
| IPI00009253 | Alpha-soluble NSF attachment protein                              | NAPA    | 1.048 | 0.278 | 0.794 |
| IPI00009329 | Utrophin                                                          | UTRN    | 1.759 | 0.830 | 0.254 |
| IPI00009342 | Ras GTPase-activating-like protein IQGAP1                         | IQGAP1  | 1.274 | 0.124 | 0.062 |
| IPI00009368 | Sideroflexin-1                                                    | SFXN1   | 1.330 | 0.617 | 0.452 |
| IPI00009456 | 5'-nucleotidase precursor                                         | NT5E    | 1.250 | 0.062 | 0.110 |
| IPI00009505 | Isoform 1 of Beta-2-syntrophin                                    | SNTB2   | 1.470 | 0.336 | 0.136 |
| IPI00009607 | Ras-related protein Rap-2c precursor                              | RAP2C   | 1.306 | 0.105 | 0.151 |
| IPI00009885 | FK506-binding protein 11 precursor                                | FKBP11  | 0.746 | 0.207 | 0.332 |
| IPI00009896 | Epoxide hydrolase 1                                               | EPHX1   | 1.518 | 0.381 | 0.305 |
| IPI00009904 | Protein disulfide-isomerase A4 precursor                          | PDIA4   | 0.806 | 0.077 | 0.049 |
| IPI00009923 | Isoform 1 of Prolyl 4-hydroxylase subunit alpha-1 precursor       | P4HA1   | 0.854 | 0.218 | 0.365 |
| IPI00009950 | Vesicular integral-membrane protein VIP36 precursor               | LMAN2   | 1.217 | 0.341 | 0.534 |
| IPI00009960 | Isoform 1 of Mitochondrial inner membrane protein                 | IMMT    | 1.470 | 1.147 | 0.666 |
| IPI00010153 | 60S ribosomal protein L23                                         | RPL23   | 0.860 | 0.043 | 0.136 |
| IPI00010204 | Splicing factor. arginine/serine-rich 3                           | SFRS3   | 0.944 | 0.033 | 0.251 |
| IPI00010271 | Isoform A of Ras-related C3 botulinum toxin substrate 1 precursor | RAC1    | 1.196 | 0.045 | 0.101 |
| IPI00010338 | Tissue factor precursor                                           | F3      | 0.990 | 0.121 | 0.925 |
| IPI00010349 | Alkyldihydroxyacetonephosphate synthase. peroxisomal precursor    | AGPS    | 1.172 | 0.369 | 0.506 |

|             |                                                                         |          |       |       |       |
|-------------|-------------------------------------------------------------------------|----------|-------|-------|-------|
| IPI00010402 | Hypothetical protein                                                    | SH3BGRL3 | 1.000 | 0.057 | 0.997 |
| IPI00010414 | PDZ and LIM domain protein 1                                            | PDLIM1   | 0.951 | 0.233 | 0.814 |
| IPI00010428 | Cell division cycle-associated protein 3                                | CDCA3    | 1.058 | 0.050 | 0.346 |
| IPI00010438 | Isoform SNAP-23a of Synaptosomal-associated protein 23                  | SNAP23   | 1.346 | 0.052 | 0.008 |
| IPI00010676 | Isoform 1 of Urokinase plasminogen activator surface receptor precursor | PLAUR    | 1.241 | 0.335 | 0.495 |
| IPI00010697 | Isoform Alpha-6X1X2B of Integrin alpha-6 precursor                      | ITGA6    | 1.269 | 0.167 | 0.109 |
| IPI00010720 | T-complex protein 1 subunit epsilon                                     | CCT5     | 1.143 | 0.650 | 0.740 |
| IPI00010740 | Isoform Long of Splicing factor, proline- and glutamine-rich            | SFPQ     | 0.755 | 0.237 | 0.215 |
| IPI00010779 | Isoform 1 of Tropomyosin alpha-4 chain                                  | TPM4     | 0.797 | 0.100 | 0.073 |
| IPI00010796 | Protein disulfide-isomerase precursor                                   | P4HB     | 0.823 | 0.039 | 0.016 |
| IPI00010896 | Chloride intracellular channel protein 1                                | CLIC1    | 2.009 | 0.423 | 0.054 |
| IPI00011200 | D-3-phosphoglycerate dehydrogenase                                      | PHGDH    | 0.667 | 0.154 | 0.065 |
| IPI00011229 | Cathepsin D precursor                                                   | CTSD     | 1.309 | 0.163 | 0.081 |
| IPI00011253 | 40S ribosomal protein S3                                                | RPS3     | 0.825 | 0.157 | 0.192 |
| IPI00011284 | Isoform Membrane-bound of Catechol O-methyltransferase                  | COMT     | 0.996 | 0.123 | 0.967 |
| IPI00011302 | CD59 glycoprotein precursor                                             | CD59     | 1.263 | 0.156 | 0.100 |
| IPI00011578 | Isoform 1 of Neuroplastin precursor                                     | NPTN     | 1.412 | 0.031 | 0.034 |
| IPI00011592 | Cytoplasmic dynein 1 light intermediate chain 2                         | DYNC1LI2 | 0.417 | 0.105 | 0.081 |
| IPI00011604 | Glycine cleavage system H protein, mitochondrial precursor              | GCSH     | 1.357 | 1.129 | 0.732 |
| IPI00011654 | Tubulin beta chain                                                      | TUBB     | 0.693 | 0.097 | 0.032 |
| IPI00011913 | Heterogeneous nuclear ribonucleoprotein A0                              | HNRPA0   | 0.589 | 0.097 | 0.105 |
| IPI00011937 | Peroxiredoxin-4                                                         | PRDX4    | 0.895 | 0.075 | 0.137 |
| IPI00012011 | Cofilin-1                                                               | CFL1     | 1.275 | 0.262 | 0.211 |
| IPI00012048 | Nucleoside diphosphate kinase A                                         | NME1     | 0.779 | 0.243 | 0.256 |
| IPI00012069 | NAD                                                                     | NQO1     | 1.040 | 0.407 | 0.913 |
| IPI00012200 | Conserved hypothetical protein                                          | C11orf48 | 1.408 | 0.264 | 0.273 |
| IPI00012442 | Ras GTPase-activating protein-binding protein 1                         | G3BP1    | 0.678 | 0.278 | 0.183 |
| IPI00012462 | Eukaryotic translation initiation factor 2A 65 kDa                      | EIF2A    | 0.825 | 0.083 | 0.206 |
| IPI00012490 | Isoform XD of Plasma membrane calcium-transporting ATPase 4             | ATP2B4   | 1.433 | 0.319 | 0.143 |
| IPI00012512 | Ras-related protein R-Ras2 precursor                                    | RRAS2    | 1.315 | 0.124 | 0.048 |
| IPI00012535 | DnaJ homolog subfamily A member 1                                       | DNAJA1   | 0.805 | 0.078 | 0.175 |
| IPI00012750 | 40S ribosomal protein S25                                               | RPS25    | 0.802 | 0.106 | 0.083 |
| IPI00012772 | 60S ribosomal protein L8                                                | RPL8     | 0.880 | 0.099 | 0.337 |
| IPI00012795 | Eukaryotic translation initiation factor 3 subunit 2                    | EIF3S2   | 0.680 | 0.064 | 0.089 |
| IPI00012837 | Kinesin heavy chain                                                     | KIF5B    | 0.587 | 0.132 | 0.032 |

|             |                                                                                            |          |       |       |       |
|-------------|--------------------------------------------------------------------------------------------|----------|-------|-------|-------|
| IPI00013195 | Mitochondrial 39S ribosomal protein L49                                                    | MRPL49   | 1.316 | 1.149 | 0.764 |
| IPI00013219 | Integrin-linked protein kinase                                                             | ILK      | 1.851 | 0.855 | 0.393 |
| IPI00013296 | 40S ribosomal protein S18                                                                  | RPS18    | 0.780 | 0.046 | 0.014 |
| IPI00013297 | 28 kDa heat- and acid-stable phosphoprotein                                                | PDAP1    | 0.571 | 0.079 | 0.011 |
| IPI00013485 | 40S ribosomal protein S2                                                                   | RPS2     | 0.806 | 0.046 | 0.107 |
| IPI00013508 | Alpha-actinin-1                                                                            | ACTN1    | 1.115 | 0.148 | 0.310 |
| IPI00013679 | Isoform DUT-M of Deoxyuridine 5'-triphosphate nucleotidohydrolase. mitochondrial precursor | DUT      | 0.934 | 0.099 | 0.368 |
| IPI00013744 | Integrin alpha-2 precursor                                                                 | ITGA2    | 1.107 | 0.036 | 0.148 |
| IPI00013808 | Alpha-actinin-4                                                                            | ACTN4    | 1.100 | 0.147 | 0.361 |
| IPI00013847 | Ubiquinol-cytochrome-c reductase complex core protein 1. mitochondrial precursor           | UQCRC1   | 1.326 | 0.885 | 0.694 |
| IPI00013881 | Heterogeneous nuclear ribonucleoprotein H                                                  | HNRPH1   | 0.912 | 0.248 | 0.703 |
| IPI00013894 | Stress-induced-phosphoprotein 1                                                            | STIP1    | 0.584 | 0.197 | 0.067 |
| IPI00013895 | Protein S100-A11                                                                           | S100A11  | 0.985 | 0.414 | 0.957 |
| IPI00013930 | Syntaxin-6                                                                                 | STX6     | 1.444 | 0.270 | 0.258 |
| IPI00013933 | Isoform DPI of Desmoplakin                                                                 | DSP      | 1.676 | 0.911 | 0.485 |
| IPI00013981 | Proto-oncogene tyrosine-protein kinase Yes                                                 | YES1     | 1.398 | 0.193 | 0.070 |
| IPI00014149 | Tetratricopeptide repeat protein 35                                                        | TTC35    | 1.051 | 0.167 | 0.741 |
| IPI00014177 | Septin-2                                                                                   | SEPT2    | 1.028 | 0.164 | 0.794 |
| IPI00014230 | Complement component 1 Q subcomponent-binding protein. mitochondrial precursor             | C1QBP    | 1.740 | 1.577 | 0.627 |
| IPI00014236 | Solute carrier family 39 member 14                                                         | SLC39A14 | 1.430 | 0.294 | 0.126 |
| IPI00014263 | Isoform Long of Eukaryotic translation initiation factor 4H                                | EIF4H    | 0.789 | 0.041 | 0.012 |
| IPI00014376 | RAB31. member RAS oncogene family variant                                                  | RAB31    | 1.197 | 0.186 | 0.374 |
| IPI00014377 | Ras-related protein Rab-32                                                                 | RAB32    | 2.306 | 0.375 | 0.127 |
| IPI00014424 | Elongation factor 1-alpha 2                                                                | EEF1A2   | 0.542 | 0.243 | 0.082 |
| IPI00014516 | Isoform 1 of Caldesmon                                                                     | CALD1    | 1.787 | 0.595 | 0.149 |
| IPI00014537 | Isoform 1 of Calumenin precursor                                                           | CALU     | 0.741 | 0.079 | 0.030 |
| IPI00014577 | Ras-related protein Rab-18                                                                 | RAB18    | 1.361 | 0.220 | 0.105 |
| IPI00014898 | Isoform 1 of Plectin-1                                                                     | PLEC1    | 0.844 | 0.067 | 0.056 |
| IPI00014958 | Isoform 1 of Serum paraoxonase/arylesterase 2                                              | PON2     | 1.351 | 0.293 | 0.339 |
| IPI00015102 | Isoform 1 of CD166 antigen precursor                                                       | ALCAM    | 1.283 | 0.210 | 0.144 |
| IPI00015148 | Ras-related protein Rap-1b precursor                                                       | RAP1B    | 1.108 | 0.195 | 0.438 |
| IPI00015262 | Calponin-2                                                                                 | CNN2     | 2.009 | 0.800 | 0.160 |
| IPI00015688 | Glypican-1 precursor                                                                       | GPC1     | 1.313 | 0.178 | 0.092 |
| IPI00015833 | Coiled-coil-helix-coiled-coil-helix domain-containing protein 3                            | CHCHD3   | 1.334 | 0.557 | 0.408 |
| IPI00015842 | Reticulocalbin-1 precursor                                                                 | RCN1     | 0.896 | 0.068 | 0.119 |

|             |                                                                 |          |       |       |       |
|-------------|-----------------------------------------------------------------|----------|-------|-------|-------|
| IPI00015947 | DnaJ homolog subfamily B member 1                               | DNAJB1   | 0.762 | 0.079 | 0.146 |
| IPI00015973 | Band 4.1-like protein 2                                         | EPB41L2  | 1.869 | 0.046 | 0.024 |
| IPI00016179 | Protein S100-A13                                                | S100A13  | 1.150 | 0.106 | 0.295 |
| IPI00016334 | Isoform 1 of Cell surface glycoprotein MUC18 precursor          | MCAM     | 1.280 | 0.184 | 0.119 |
| IPI00016339 | Ras-related protein Rab-5C                                      | RAB5C    | 1.325 | 0.181 | 0.089 |
| IPI00016342 | Ras-related protein Rab-7a                                      | RAB7A    | 1.108 | 0.175 | 0.399 |
| IPI00016372 | Ras-related protein Rab-9                                       | RAB9A    | 1.008 | 0.381 | 0.981 |
| IPI00016373 | Ras-related protein Rab-13                                      | RAB13    | 1.249 | 0.220 | 0.356 |
| IPI00016513 | Ras-related protein Rab-10                                      | RAB10    | 1.222 | 0.118 | 0.082 |
| IPI00016608 | Transmembrane emp24 domain-containing protein 2 precursor       | TMED2    | 1.164 | 0.274 | 0.553 |
| IPI00016610 | Poly(rC)-binding protein 1                                      | PCBP1    | 0.438 | 0.409 | 0.302 |
| IPI00016621 | AP-2 complex subunit alpha-2                                    | AP2A2    | 2.387 | 1.326 | 0.378 |
| IPI00016670 | UPF0404 protein C11orf59                                        | C11orf59 | 0.709 | 0.287 | 0.388 |
| IPI00016786 | Isoform 2 of Cell division control protein 42 homolog precursor | CDC42    | 0.972 | 0.048 | 0.423 |
| IPI00017292 | Isoform 1 of Catenin beta-1                                     | CTNNB1   | 1.280 | 0.099 | 0.040 |
| IPI00017334 | Prohibitin                                                      | PHB      | 1.339 | 0.973 | 0.708 |
| IPI00017342 | Rho-related GTP-binding protein RhoG precursor                  | RHOG     | 1.147 | 0.122 | 0.171 |
| IPI00017344 | Ras-related protein Rab-5B                                      | RAB5B    | 1.263 | 0.130 | 0.073 |
| IPI00017367 | Radixin                                                         | RDX      | 1.367 | 0.521 | 0.346 |
| IPI00017567 | Isoform Long of Endoglin precursor                              | ENG      | 1.316 | 0.408 | 0.471 |
| IPI00017596 | Microtubule-associated protein RP/EB family member 1            | MAPRE1   | 0.874 | 0.092 | 0.140 |
| IPI00017617 | Probable ATP-dependent RNA helicase DDX5                        | DDX5     | 1.010 | 0.269 | 0.967 |
| IPI00017726 | Isoform 1 of 3-hydroxyacyl-CoA dehydrogenase type-2             | HSD17B10 | 0.974 | 0.604 | 0.962 |
| IPI00018146 | 14-3-3 protein theta                                            | YWHAQ    | 0.906 | 0.123 | 0.317 |
| IPI00018219 | Transforming growth factor-beta-induced protein ig-h3 precursor | TGFBI    | 2.692 | 0.021 | 0.000 |
| IPI00018274 | Isoform 1 of Epidermal growth factor receptor precursor         | EGFR     | 1.759 | 0.957 | 0.303 |
| IPI00018331 | SNARE-associated protein Snapin                                 | SNAPAP   | 1.049 | 0.187 | 0.776 |
| IPI00018364 | Ras-related protein Rap-2b precursor                            | RAP2B    | 1.137 | 0.178 | 0.474 |
| IPI00018452 | Copine-1                                                        | CPNE1    | 1.137 | 0.202 | 0.360 |
| IPI00018465 | T-complex protein 1 subunit eta                                 | CCT7     | 1.042 | 0.517 | 0.901 |
| IPI00018901 | Isoform 1 of Gamma-glutamyltranspeptidase 1 precursor           | GGT1     | 1.174 | 0.153 | 0.353 |
| IPI00019146 | Isoform 1 of Coxsackievirus and adenovirus receptor precursor   | CXADR    | 1.282 | 0.142 | 0.075 |
| IPI00019157 | Chondroitin sulfate proteoglycan 4 precursor                    | CSPG4    | 1.565 | 0.260 | 0.064 |
| IPI00019376 | Septin-11                                                       | SEPT11   | 0.997 | 0.273 | 0.986 |
| IPI00019385 | Translocon-associated protein. delta subunit precursor          | SSR4     | 0.896 | 0.108 | 0.238 |



|             |                                                                     |          |       |       |       |
|-------------|---------------------------------------------------------------------|----------|-------|-------|-------|
| IPI00019472 | Neutral amino acid transporter B                                    | SLC1A5   | 0.910 | 0.092 | 0.230 |
| IPI00019502 | Myosin-9                                                            | MYH9     | 1.486 | 0.213 | 0.058 |
| IPI00019906 | Isoform 2 of Basigin precursor                                      | BSG      | 1.277 | 0.194 | 0.132 |
| IPI00019971 | Syntaxin-binding protein 2                                          | STXBP2   | 1.010 | 0.101 | 0.914 |
| IPI00019997 | Lin-7 homolog C                                                     | LIN7C    | 1.410 | 0.091 | 0.016 |
| IPI00020228 | Frizzled-6 precursor                                                | FZD6     | 1.690 | 0.064 | 0.042 |
| IPI00020418 | Ras-related protein R-Ras precursor                                 | RRAS     | 1.343 | 0.146 | 0.055 |
| IPI00020436 | Ras-related protein Rab-11B                                         | RAB11B   | 1.134 | 0.158 | 0.280 |
| IPI00020513 | cDNA FLJ53160. highly similar to zyxin                              | FLJ53160 | 1.524 | 0.576 | 0.256 |
| IPI00020557 | Low-density lipoprotein receptor-related protein 1 precursor        | LRP1     | 1.348 | 0.098 | 0.026 |
| IPI00020599 | Calreticulin precursor                                              | CALR     | 0.918 | 0.003 | 0.019 |
| IPI00020984 | Calnexin precursor                                                  | CANX     | 1.245 | 0.312 | 0.307 |
| IPI00021033 | Isoform 1 of Collagen alpha-1(III) chain precursor                  | COL3A1   | 3.458 | 1.340 | 0.086 |
| IPI00021048 | Isoform 1 of Myoferlin                                              | FER1L3   | 1.247 | 0.232 | 0.207 |
| IPI00021076 | Isoform Long of Plakophilin-4                                       | PKP4     | 1.226 | 0.017 | 0.002 |
| IPI00021263 | 14-3-3 protein zeta/delta                                           | YWHAZ    | 0.942 | 0.215 | 0.687 |
| IPI00021266 | 60S ribosomal protein L23a                                          | RPL23A   | 0.896 | 0.174 | 0.411 |
| IPI00021267 | Ephrin type-A receptor 2 precursor                                  | EPHA2    | 1.177 | 0.275 | 0.530 |
| IPI00021405 | Isoform A of Lamin-A/C                                              | LMNA     | 1.039 | 0.238 | 0.803 |
| IPI00021428 | 3Actin. alpha skeletal muscle                                       | ACTA1    | 1.130 | 0.578 | 0.803 |
| IPI00021435 | 26S protease regulatory subunit 7                                   | PSMC2    | 0.535 | 0.138 | 0.131 |
| IPI00021439 | Actin. cytoplasmic 1                                                | ACTB     | 1.384 | 0.276 | 0.137 |
| IPI00021440 | Actin. cytoplasmic 2                                                | ACTG1    | 1.520 | 0.107 | 0.014 |
| IPI00021695 | Isoform D of Plasma membrane calcium-transporting ATPase 1          | ATP2B1   | 1.231 | 0.131 | 0.093 |
| IPI00021700 | Proliferating cell nuclear antigen                                  | PCNA     | 0.635 | 0.222 | 0.258 |
| IPI00021766 | Isoform 1 of Reticulon-4                                            | RTN4     | 1.216 | 0.146 | 0.124 |
| IPI00021805 | Microsomal glutathione S-transferase 1                              | MGST1    | 1.244 | 0.611 | 0.673 |
| IPI00021812 | Neuroblast differentiation-associated protein AHNAK (Fragment)      | AHNAK    | 1.152 | 0.112 | 0.144 |
| IPI00021840 | 40S ribosomal protein S6                                            | RPS6     | 0.816 | 0.105 | 0.093 |
| IPI00021923 | Protein FAM3C precursor                                             | FAM3C    | 1.769 | 0.129 | 0.075 |
| IPI00022048 | Prostaglandin F2 receptor negative regulator precursor              | PTGFRN   | 1.498 | 0.504 | 0.229 |
| IPI00022078 | Protein NDRG1                                                       | NDRG1    | 0.405 | 0.265 | 0.195 |
| IPI00022143 | Isoform 1 of Protein FAM62A                                         | FAM62A   | 1.461 | 0.302 | 0.118 |
| IPI00022149 | Isoform 2 of Phosphatidylinositol-4-phosphate 5-kinase type-1 alpha | PIP5K1A  | 1.479 | 0.235 | 0.212 |
| IPI00022344 | Feline leukemia virus subgroup C receptor-related protein 1         | FLVCR    | 1.209 | 0.214 | 0.233 |

|             |                                                                   |          |       |       |       |
|-------------|-------------------------------------------------------------------|----------|-------|-------|-------|
| IPI00022418 | Isoform 1 of Fibronectin precursor                                | FN1      | 1.092 | 0.886 | 0.908 |
| IPI00022462 | Transferrin receptor protein 1                                    | TFRC     | 1.139 | 0.189 | 0.331 |
| IPI00022542 | Rho-associated protein kinase 1                                   | ROCK1    | 1.818 | 0.384 | 0.204 |
| IPI00022558 | Isoform 1 of Myelin protein zero-like protein 1 precursor         | MPZL1    | 1.437 | 0.279 | 0.114 |
| IPI00022624 | Retinoic acid-induced protein 3                                   | GPRC5A   | 0.969 | 0.178 | 0.790 |
| IPI00022649 | Isoform 1 of Solute carrier family 12 member 2                    | SLC12A2  | 1.173 | 0.081 | 0.066 |
| IPI00022661 | Isoform Delta of Poliovirus receptor-related protein 2 precursor  | PVRL2    | 1.185 | 0.093 | 0.075 |
| IPI00022774 | Transitional endoplasmic reticulum ATPase                         | VCP      | 0.941 | 0.158 | 0.587 |
| IPI00022977 | Creatine kinase B-type                                            | CKB      | 0.751 | 0.204 | 0.168 |
| IPI00023048 | Elongation factor 1-delta                                         | EEF1D    | 0.700 | 0.031 | 0.004 |
| IPI00023122 | Isoform 1 of PDZ and LIM domain protein 7                         | PDLIM7   | 1.137 | 0.079 | 0.245 |
| IPI00023334 | Isoform 1 of Mitochondrial 39S ribosomal protein L4               | MRPL4    | 0.834 | 0.453 | 0.696 |
| IPI00023510 | Ras-related protein Rab-5A                                        | RAB5A    | 1.281 | 0.235 | 0.174 |
| IPI00023526 | Isoform 1 of Ras-related protein Rab-6A                           | RAB6A    | 1.370 | 0.209 | 0.092 |
| IPI00023542 | Transmembrane emp24 protein transport domain containing 9         | TMED9    | 1.161 | 0.383 | 0.658 |
| IPI00023605 | Isoform 1 of Cdc42 effector protein 1                             | CDC42EP1 | 1.261 | 0.013 | 0.023 |
| IPI00023640 | Programmed cell death protein 5                                   | PDCD5    | 0.608 | 0.090 | 0.102 |
| IPI00023748 | Nascent polypeptide-associated complex subunit alpha              | NACA     | 0.683 | 0.037 | 0.052 |
| IPI00023785 | Isoform 1 of Probable ATP-dependent RNA helicase DDX17            | DDX17    | 0.777 | 0.021 | 0.042 |
| IPI00023860 | Nucleosome assembly protein 1-like 1                              | NAP1L1   | 0.530 | 0.038 | 0.037 |
| IPI00024046 | Cadherin-13 precursor                                             | CDH13    | 1.226 | 0.241 | 0.245 |
| IPI00024067 | Isoform 1 of Clathrin heavy chain 1                               | CLTC     | 0.794 | 0.220 | 0.413 |
| IPI00024095 | Annexin A3                                                        | ANXA3    | 1.039 | 0.250 | 0.813 |
| IPI00024145 | Isoform 1 of Voltage-dependent anion-selective channel protein 2  | VDAC2    | 1.432 | 0.497 | 0.271 |
| IPI00024320 | Putative RNA -binding protein 3                                   | RBM3     | 0.914 | 0.144 | 0.554 |
| IPI00024403 | Copine-3                                                          | CPNE3    | 1.284 | 0.214 | 0.149 |
| IPI00024642 | Isoform 1 of Coiled-coil domain-containing protein 47 precursor   | CCDC47   | 0.835 | 0.153 | 0.202 |
| IPI00024650 | Monocarboxylate transporter 1                                     | SLC16A1  | 1.236 | 0.225 | 0.211 |
| IPI00024660 | Isoform 1 of Uncharacterized protein KIAA0174                     | KIAA0174 | 0.870 | 0.411 | 0.732 |
| IPI00024670 | Receptor expression-enhancing protein 5                           | REEP5    | 1.177 | 0.099 | 0.091 |
| IPI00024705 | PDZ domain-containing protein GIPC1                               | GIPC1    | 1.735 | 0.177 | 0.108 |
| IPI00024911 | Endoplasmic reticulum protein ERp29 precursor                     | ERP29    | 0.954 | 0.087 | 0.457 |
| IPI00024915 | Isoform Mitochondrial of Peroxiredoxin-5. mitochondrial precursor | PRDX5    | 0.658 | 0.136 | 0.174 |
| IPI00024919 | Thioredoxin-dependent peroxide reductase. mitochondrial precursor | PRDX3    | 1.136 | 0.888 | 0.864 |
| IPI00024920 | ATP synthase delta chain. mitochondrial precursor                 | ATP5D    | 1.354 | 0.980 | 0.699 |

|             |                                                                                         |          |       |       |       |
|-------------|-----------------------------------------------------------------------------------------|----------|-------|-------|-------|
| IPI00024933 | 60S ribosomal protein L12                                                               | RPL12    | 0.851 | 0.063 | 0.055 |
| IPI00024976 | Mitochondrial import receptor subunit TOM22 homolog                                     | TOMM22   | 2.000 | 1.390 | 0.494 |
| IPI00025049 | Cation-dependent mannose-6-phosphate receptor precursor                                 | M6PR     | 1.249 | 0.231 | 0.371 |
| IPI00025086 | Cytochrome c oxidase subunit 5A. mitochondrial precursor                                | COX5A    | 1.453 | 1.020 | 0.643 |
| IPI00025091 | 40S ribosomal protein S11                                                               | RPS11    | 0.654 | 0.084 | 0.109 |
| IPI00025252 | Protein disulfide-isomerase A3 precursor                                                | PDIA3    | 1.027 | 0.081 | 0.620 |
| IPI00025277 | Programmed cell death protein 6                                                         | PDCD6    | 1.531 | 0.374 | 0.133 |
| IPI00025285 | Vacuolar ATP synthase subunit G 1                                                       | ATP6V1G1 | 0.767 | 0.195 | 0.340 |
| IPI00025329 | 60S ribosomal protein L19                                                               | RPL19    | 0.805 | 0.243 | 0.299 |
| IPI00025366 | Citrate synthase. mitochondrial precursor                                               | CS       | 1.426 | 1.274 | 0.719 |
| IPI00025447 | EEF1A1protein                                                                           | EEF1A1   | 0.498 | 0.002 | 0.001 |
| IPI00025491 | Eukaryotic initiation factor 4A-I                                                       | EIF4A1   | 0.702 | 0.151 | 0.076 |
| IPI00025512 | Heat-shock protein beta-1                                                               | HSPB1    | 0.500 | 0.161 | 0.033 |
| IPI00025796 | NADH dehydrogenase [ubiquinone] iron-sulfur protein 3. mitochondrial precursor          | NDUFS3   | 1.504 | 1.165 | 0.651 |
| IPI00025809 | Alpha-1.6-mannosyl-glycoprotein 2-beta-N-acetylglucosaminyltransferase                  | MGAT2    | 1.466 | 0.607 | 0.474 |
| IPI00025874 | Dolichyl-diphosphooligosaccharide--protein glycosyltransferase 67 kDa subunit precursor | RPN1     | 1.008 | 0.229 | 0.960 |
| IPI00025974 | Charged multivesicular body protein 4b                                                  | CHMP4B   | 1.384 | 0.854 | 0.518 |
| IPI00026111 | Isoform 1 of Transmembrane and coiled-coil domain-containing protein 1                  | TMCO1    | 1.031 | 0.179 | 0.845 |
| IPI00026154 | Glucosidase 2 subunit beta precursor                                                    | PRKCSH   | 0.833 | 0.123 | 0.143 |
| IPI00026185 | Isoform 1 of F-actin capping protein subunit beta                                       | CAPZB    | 0.954 | 0.019 | 0.183 |
| IPI00026241 | Bone marrow stromal antigen 2 precursor                                                 | BST2     | 1.349 | 0.321 | 0.200 |
| IPI00026268 | Guanine nucleotide-binding protein G(I)/G(S)/G(T) subunit beta 1                        | GNB1     | 1.602 | 0.246 | 0.052 |
| IPI00026271 | 40S ribosomal protein S14                                                               | RPS14    | 0.788 | 0.126 | 0.100 |
| IPI00026302 | 60S ribosomal protein L31                                                               | RPL31    | 0.907 | 0.185 | 0.609 |
| IPI00026314 | Isoform 1 of Gelsolin precursor                                                         | GSN      | 1.078 | 0.037 | 0.204 |
| IPI00026328 | Thioredoxin domain-containing protein 12 precursor                                      | TXNDC12  | 0.874 | 0.149 | 0.279 |
| IPI00026530 | ERGIC-53 protein precursor                                                              | LMAN1    | 1.139 | 0.250 | 0.437 |
| IPI00026848 | Alpha-2-macroglobulin receptor-associated protein precursor                             | LRPAP1   | 1.004 | 0.179 | 0.970 |
| IPI00026942 | SPFH2 protein (Fragment)                                                                | ERLIN2   | 0.935 | 0.237 | 0.766 |
| IPI00026994 | PRA1 family protein 2                                                                   | PRAF2    | 1.035 | 0.246 | 0.873 |
| IPI00027087 | Isoform 1 of Neural cell adhesion molecule L1 precursor                                 | L1CAM    | 1.329 | 0.335 | 0.231 |
| IPI00027107 | Tu translation elongation factor. mitochondrial                                         | TUFM     | 1.115 | 0.829 | 0.876 |
| IPI00027175 | Sorcin                                                                                  | SRI      | 0.854 | 0.264 | 0.577 |
| IPI00027194 | Syntaxin-18                                                                             | STX18    | 1.109 | 0.204 | 0.590 |
| IPI00027230 | Endoplasmic precursor                                                                   | HSP90B1  | 0.767 | 0.077 | 0.034 |

|             |                                                                             |         |       |       |       |
|-------------|-----------------------------------------------------------------------------|---------|-------|-------|-------|
| IPI00027232 | Insulin-like growth factor 1 receptor precursor                             | IGF1R   | 1.033 | 0.295 | 0.863 |
| IPI00027252 | Prohibitin-2                                                                | PHB2    | 1.573 | 0.749 | 0.316 |
| IPI00027255 | Myosin light polypeptide 6B                                                 | MYL6B   | 1.160 | 0.033 | 0.091 |
| IPI00027270 | 60S ribosomal protein L26                                                   | RPL26   | 0.857 | 0.155 | 0.251 |
| IPI00027341 | Macrophage-capping protein                                                  | CAPG    | 1.084 | 0.159 | 0.458 |
| IPI00027350 | Peroxiredoxin-2                                                             | PRDX2   | 0.810 | 0.174 | 0.199 |
| IPI00027397 | Isoform 1 of Hematological and neurological expressed 1-like protein        | CRAMP1L | 1.062 | 0.006 | 0.047 |
| IPI00027422 | Isoform Beta-4C of Integrin beta-4 precursor                                | ITGB4   | 1.467 | 0.069 | 0.007 |
| IPI00027434 | Rho-related GTP-binding protein RhoC precursor                              | RHOC    | 1.182 | 0.131 | 0.301 |
| IPI00027438 | Flotillin-1                                                                 | FLOT1   | 1.307 | 0.229 | 0.146 |
| IPI00027463 | Protein S100-A6                                                             | S100A6  | 0.783 | 0.074 | 0.150 |
| IPI00027493 | 4F2 cell-surface antigen heavy chain                                        | SLC3A2  | 1.145 | 0.176 | 0.290 |
| IPI00027497 | Glucose-6-phosphate isomerase                                               | GPI     | 0.884 | 0.008 | 0.032 |
| IPI00027500 | Transforming protein RhoA precursor                                         | RHOA    | 1.284 | 0.040 | 0.063 |
| IPI00027505 | Isoform 1 of Integrin alpha-V precursor                                     | ITGAV   | 1.515 | 0.256 | 0.073 |
| IPI00027547 | Dermcidin precursor                                                         | DCD     | 1.799 | 2.378 | 0.718 |
| IPI00027626 | T-complex protein 1 subunit zeta                                            | CCT6A   | 1.075 | 0.563 | 0.839 |
| IPI00028055 | Transmembrane emp24 domain-containing protein 10 precursor                  | TMED10  | 1.320 | 0.393 | 0.294 |
| IPI00028077 | Isoform 1 of Presenilin-1                                                   | PSEN1   | 1.051 | 0.022 | 0.192 |
| IPI00028091 | Actin-like protein 3                                                        | ACTR3   | 1.301 | 0.313 | 0.238 |
| IPI00028108 | Regulator of G-protein signaling 19                                         | RGS19   | 1.160 | 0.244 | 0.525 |
| IPI00028481 | Ras-related protein Rab-8A                                                  | RAB8A   | 1.230 | 0.176 | 0.152 |
| IPI00028888 | Isoform 1 of Heterogeneous nuclear ribonucleoprotein D0                     | HNRPD   | 0.854 | 0.227 | 0.530 |
| IPI00028911 | Dystroglycan precursor                                                      | DAG1    | 1.542 | 0.029 | 0.024 |
| IPI00028931 | Desmoglein 2 preproprotein                                                  | DSG2    | 1.398 | 0.181 | 0.062 |
| IPI00028946 | Isoform 3 of Reticulon-3                                                    | RTN3    | 1.148 | 0.004 | 0.013 |
| IPI00029133 | ATP synthase B chain. mitochondrial precursor                               | ATP5F1  | 1.117 | 0.661 | 0.844 |
| IPI00029273 | Isoform 1 of Hepatocyte growth factor receptor precursor                    | MET     | 1.436 | 0.228 | 0.080 |
| IPI00029601 | Src substrate cortactin                                                     | CTTN    | 1.767 | 0.361 | 0.067 |
| IPI00029625 | Flotillin-2                                                                 | FLOT2   | 1.211 | 0.325 | 0.528 |
| IPI00029730 | Syntaxin-4                                                                  | STX4    | 1.252 | 0.091 | 0.041 |
| IPI00029744 | Single-stranded DNA-binding protein. mitochondrial precursor                | SSBP1   | 1.074 | 0.823 | 0.919 |
| IPI00030179 | 60S ribosomal protein L7                                                    | RPL7    | 0.839 | 0.106 | 0.119 |
| IPI00030351 | Isoform 1 of Disks large homolog 1                                          | DLG1    | 1.249 | 0.151 | 0.258 |
| IPI00030738 | Isoform 2 of Sperm antigen with calponin homology and coiled-coil domains 1 | SPECC1  | 1.086 | 0.258 | 0.719 |

|             |                                                                                          |          |       |       |       |
|-------------|------------------------------------------------------------------------------------------|----------|-------|-------|-------|
| IPI00031131 | C20orf3 Adipocyte plasma membrane-associated protein                                     | C20orf3  | 1.116 | 0.205 | 0.429 |
| IPI00031169 | Ras-related protein Rab-2A                                                               | RAB2A    | 1.209 | 0.257 | 0.294 |
| IPI00031397 | Long-chain-fatty-acid--CoA ligase 3                                                      | ACSL3    | 1.070 | 0.117 | 0.405 |
| IPI00031605 | AHNAK nucleoprotein                                                                      | AHNAK    | 1.248 | 0.252 | 0.397 |
| IPI00031691 | 60S ribosomal protein L9                                                                 | RPL9     | 0.875 | 0.109 | 0.186 |
| IPI00031697 | Transmembrane protein 109 precursor                                                      | TMEM109  | 1.102 | 0.029 | 0.025 |
| IPI00031812 | Nuclease sensitive element-binding protein 1                                             | YBX1     | 0.907 | 0.234 | 0.564 |
| IPI00031836 | Developmentally-regulated GTP-binding protein 1                                          | DRG1     | 0.911 | 0.039 | 0.190 |
| IPI00032003 | Emerin                                                                                   | EMD      | 1.074 | 0.270 | 0.682 |
| IPI00032038 | Isoform 1 of Carnitine O-palmitoyltransferase I. liver isoform                           | CPT1A    | 1.332 | 0.777 | 0.654 |
| IPI00032064 | PALM2-AKAP2 protein isoform 1                                                            | AKAP2    | 1.159 | 0.238 | 0.368 |
| IPI00032140 | Serpin H1 precursor                                                                      | SERPINH1 | 0.777 | 0.100 | 0.061 |
| IPI00032826 | Hsc70-interacting protein                                                                | ST13     | 0.682 | 0.174 | 0.236 |
| IPI00032831 | Synaptosomal-associated protein 29                                                       | SNAP29   | 1.085 | 0.332 | 0.779 |
| IPI00033025 | Isoform 1 of Septin-7                                                                    | SEPT7    | 0.965 | 0.203 | 0.793 |
| IPI00033494 | Myosin regulatory light chain                                                            | MRLC2    | 1.436 | 0.097 | 0.016 |
| IPI00034159 | Vacuolar ATP synthase subunit d                                                          | ATP6V0D1 | 0.983 | 0.130 | 0.883 |
| IPI00044683 | Isoform 1 of Amyotrophic lateral sclerosis 2 chromosomal region candidate gene 4 protein | ALS2CR4  | 1.229 | 0.110 | 0.068 |
| IPI00045396 | Isoform 2 of Calumenin precursor                                                         | CALU     | 0.798 | 0.006 | 0.013 |
| IPI00045921 | TOB3                                                                                     | ATAD3B   | 1.875 | 0.501 | 0.245 |
| IPI00046057 | Isoform 2 of Syntaxin-binding protein 1                                                  | STXBP1   | 1.056 | 0.115 | 0.487 |
| IPI00056310 | Secretory carrier-associated membrane protein 4                                          | SCAMP4   | 1.045 | 0.286 | 0.861 |
| IPI00059472 | Vesicle transport through interaction with t-SNAREs homolog 1A                           | VT11A    | 1.200 | 0.451 | 0.643 |
| IPI00060627 | Coiled-coil domain-containing protein 124                                                | CCDC124  | 0.828 | 0.239 | 0.338 |
| IPI00060715 | BTB/POZ domain-containing protein KCTD12                                                 | KCTD12   | 0.526 | 0.304 | 0.114 |
| IPI00063234 | PRKAR2A protein                                                                          | PRKAR2A  | 0.834 | 0.009 | 0.025 |
| IPI00063784 | Isoform Long of Vesicle transport through interaction with t-SNAREs homolog 1B           | VT11B    | 1.149 | 0.531 | 0.759 |
| IPI00071059 | Bax epsilon                                                                              | BAX      | 0.676 | 0.118 | 0.161 |
| IPI00072377 | Isoform 1 of Protein SET                                                                 | SET      | 0.989 | 0.037 | 0.664 |
| IPI00075248 | Calmodulin                                                                               | CALM2    | 1.251 | 0.072 | 0.026 |
| IPI00095891 | Isoform XLas-1 of Guanine nucleotide-binding protein G(s) subunit alpha isoforms XLas    | GNAS     | 1.672 | 0.279 | 0.053 |
| IPI00099650 | Jagged-1precursor                                                                        | JAG1     | 0.904 | 0.221 | 0.650 |
| IPI00100796 | Charged multivesicular body protein 5                                                    | CHMP5    | 0.751 | 0.175 | 0.294 |
| IPI00100980 | EH domain-containing protein 2                                                           | EHD2     | 1.878 | 0.384 | 0.058 |
| IPI00103175 | Isoform 1 of Soluble calcium-activated nucleotidase 1                                    | CANT1    | 1.578 | 0.266 | 0.200 |

|             |                                                                             |           |       |       |       |
|-------------|-----------------------------------------------------------------------------|-----------|-------|-------|-------|
| IPI00106646 | 45 kDa calcium-binding protein precursor                                    | SDF4      | 1.710 | 0.703 | 0.222 |
| IPI00107831 | Receptor-type tyrosine-protein phosphatase F precursor                      | PTPRF     | 2.085 | 0.516 | 0.068 |
| IPI00141318 | Isoform 1 of Cytoskeleton-associated protein 4                              | CKAP4     | 0.734 | 0.123 | 0.065 |
| IPI00150961 | Membrane component chromosome 11 surface marker 1 isoform 1                 | CAPRIN1   | 0.777 | 0.121 | 0.234 |
| IPI00151710 | Transmembrane protein 16F                                                   | TMEM16F   | 1.160 | 0.124 | 0.319 |
| IPI00152418 | Decay-accelerating factor splicing variant 4                                | CD55      | 1.147 | 0.167 | 0.268 |
| IPI00152540 | Isoform 1 of CD109 antigen precursor                                        | CD109     | 1.296 | 0.215 | 0.140 |
| IPI00152642 | Leucine-rich repeat-containing protein 8C                                   | LRR8C     | 0.967 | 0.087 | 0.685 |
| IPI00152853 | Isoform 1 of Uncharacterized protein KIAA1949                               | KIAA1949  | 1.089 | 0.111 | 0.298 |
| IPI00152898 | Isoform 1 of AP-1 complex subunit sigma-1A                                  | AP1S1     | 0.882 | 0.060 | 0.076 |
| IPI00156689 | Synaptic vesicle membrane protein VAT-1 homolog                             | VAT1      | 0.796 | 0.055 | 0.023 |
| IPI00163187 | Fascin                                                                      | FSCN1     | 1.493 | 0.631 | 0.309 |
| IPI00165041 | Treacher Collins-Franceschetti syndrome 1 isoform a                         | TCOF1     | 1.134 | 0.358 | 0.690 |
| IPI00165393 | Acidic leucine-rich nuclear phosphoprotein 32 family member E               | ANP32E    | 1.008 | 0.036 | 0.811 |
| IPI00166768 | TUBA1C protein                                                              | TUBA1C    | 0.639 | 0.043 | 0.053 |
| IPI00168262 | Glycosyltransferase 25 domain-containing protein 1                          | GLT25D1   | 0.697 | 0.100 | 0.146 |
| IPI00169267 | ADP-ribosylation factor-like protein 6-interacting protein 2                | ARL6IP2   | 1.493 | 0.240 | 0.211 |
| IPI00169383 | Phosphoglycerate kinase 1                                                   | PGK1      | 0.793 | 0.114 | 0.088 |
| IPI00170692 | Vesicle-associated membrane protein-associated protein A                    | VAPA      | 1.048 | 0.037 | 0.319 |
| IPI00171411 | Golgi phosphoprotein 2                                                      | GOLPH2    | 2.735 | 0.783 | 0.062 |
| IPI00171412 | Isoform 1 of Sulfatase-modifying factor 2 precursor                         | SUMF2     | 0.987 | 0.175 | 0.912 |
| IPI00171421 | C8orf55 mesenchymal stem cell protein DSCD75                                | C8orf55   | 1.267 | 0.419 | 0.385 |
| IPI00171438 | Thioredoxin domain-containing protein 5 precursor                           | TXNDC5    | 0.855 | 0.153 | 0.243 |
| IPI00171614 | Monocarboxylate transporter 2                                               | SLC16A7   | 1.338 | 0.277 | 0.334 |
| IPI00171903 | Isoform 1 of Heterogeneous nuclear ribonucleoprotein M                      | HNRPM     | 0.980 | 0.148 | 0.883 |
| IPI00172656 | UBX domain-containing protein 8                                             | UBXD8     | 1.160 | 0.296 | 0.448 |
| IPI00173589 | Similar to 60S ribosomal protein L29                                        | LOC284064 | 0.831 | 0.200 | 0.444 |
| IPI00176221 | Neuronal growth regulator 1 precursor                                       | NEGR1     | 1.169 | 0.323 | 0.461 |
| IPI00176903 | Isoform 1 of Polymerase I and transcript release factor                     | PTRF      | 1.140 | 0.525 | 0.770 |
| IPI00178440 | Elongation factor 1-beta                                                    | EEF1B2    | 0.520 | 0.109 | 0.017 |
| IPI00179326 | Brain-specific angiogenesis inhibitor 1-associated protein 2-like protein 1 | BAIAP2L1  | 1.762 | 0.639 | 0.175 |
| IPI00179330 | UBB ubiquitin and ribosomal protein S27a precursor                          | RPS27A    | 1.309 | 0.130 | 0.054 |
| IPI00179473 | 48 kDa protein                                                              | SQSTM1    | 0.670 | 0.170 | 0.079 |
| IPI00179709 | Isoform 1 of Tubulin alpha-2 chain                                          | TUBA3C    | 0.377 | 0.226 | 0.160 |
| IPI00182469 | Isoform 1AB of Catenin delta-1                                              | CTNND1    | 1.562 | 0.565 | 0.227 |

|             |                                                              |           |       |       |       |
|-------------|--------------------------------------------------------------|-----------|-------|-------|-------|
| IPI00182933 | Isoform 2 of Cytochrome b5                                   | CYB5A     | 1.073 | 0.173 | 0.659 |
| IPI00183002 | Isoform 1 of Protein phosphatase 1 regulatory subunit 12A    | PPP1R12A  | 1.389 | 0.016 | 0.019 |
| IPI00183695 | Protein S100-A10                                             | S100A10   | 1.223 | 0.201 | 0.361 |
| IPI00186290 | Elongation factor 2                                          | EEF2      | 0.767 | 0.125 | 0.085 |
| IPI00186826 | Receptor protein tyrosine kinase variant EphB4v1             | EPHB4     | 1.659 | 0.193 | 0.130 |
| IPI00215613 | Integrin alpha-11 precursor                                  | ITGA11    | 1.703 | 0.339 | 0.070 |
| IPI00215719 | 60S ribosomal protein L18                                    | RPL18     | 0.956 | 0.013 | 0.132 |
| IPI00215743 | Isoform 3 of Ribosome-binding protein 1                      | RRBP1     | 0.814 | 0.246 | 0.320 |
| IPI00215780 | 40S ribosomal protein S19                                    | RPS19     | 0.784 | 0.096 | 0.060 |
| IPI00215893 | Heme oxygenase 1                                             | HMOX1     | 0.904 | 0.004 | 0.020 |
| IPI00215901 | Isoform 1 of Adenylate kinase isoenzyme 2. mitochondrial     | AK2       | 1.207 | 0.651 | 0.731 |
| IPI00215914 | ADP-ribosylation factor 1                                    | ARF1      | 1.058 | 0.118 | 0.615 |
| IPI00215948 | Isoform 1 of Catenin alpha-1                                 | CTNNA1    | 1.331 | 0.116 | 0.039 |
| IPI00215965 | Isoform A1-B of Heterogeneous nuclear ribonucleoprotein A1   | HNRPA1L-2 | 0.835 | 0.160 | 0.216 |
| IPI00215995 | Isoform Alpha-3A of Integrin alpha-3 precursor               | ITGA3     | 1.326 | 0.044 | 0.006 |
| IPI00216049 | Isoform 1 of Heterogeneous nuclear ribonucleoprotein K       | HNRPK     | 0.880 | 0.206 | 0.418 |
| IPI00216134 | Tropomyosin 1 alpha chain isoform 7                          | TPM1      | 0.819 | 0.007 | 0.018 |
| IPI00216135 | Isoform 3 of Tropomyosin-1 alpha chain                       | TPM1      | 0.677 | 0.168 | 0.225 |
| IPI00216138 | Transgelin                                                   | TAGLN     | 2.872 | 2.110 | 0.264 |
| IPI00216219 | Isoform Long of Tight junction protein ZO-1                  | TJP1      | 0.992 | 0.233 | 0.958 |
| IPI00216308 | Voltage-dependent anion-selective channel protein 1          | VDAC1     | 1.459 | 0.378 | 0.170 |
| IPI00216318 | Isoform Long of 14-3-3 protein beta/alpha                    | YWHAB     | 0.902 | 0.016 | 0.072 |
| IPI00216393 | Isoform Non-brain of Clathrin light chain A                  | CLTA      | 0.861 | 0.181 | 0.473 |
| IPI00216546 | Isoform 2 of Probable palmitoyltransferase ZDHHC5            | ZDHHC5    | 1.354 | 0.019 | 0.001 |
| IPI00216587 | 40S ribosomal protein S8                                     | RPS8      | 0.739 | 0.103 | 0.048 |
| IPI00216592 | Isoform C1 of Heterogeneous nuclear ribonucleoproteins C1/C2 | HNRPC     | 0.861 | 0.028 | 0.089 |
| IPI00216682 | Calponin-3                                                   | CNN3      | 1.634 | 0.139 | 0.016 |
| IPI00216691 | Profilin-1                                                   | PFN1      | 0.808 | 0.060 | 0.138 |
| IPI00216694 | Plastin 3                                                    | PLS3      | 1.616 | 0.476 | 0.154 |
| IPI00216975 | TPM4 Isoform 2 of Tropomyosin alpha-4 chain                  | TPM4      | 0.778 | 0.075 | 0.036 |
| IPI00217030 | 40S ribosomal protein S4. X isoform                          | RPS4X     | 0.775 | 0.150 | 0.281 |
| IPI00217059 | Isoform 2 of Coiled-coil domain-containing protein 50        | CCDC50    | 1.663 | 0.138 | 0.014 |
| IPI00217121 | Uncharacterized protein C19orf21                             | C19orf21  | 1.256 | 0.148 | 0.096 |
| IPI00217143 | SDHA protein                                                 | SDHA      | 1.150 | 0.737 | 0.822 |
| IPI00217465 | Histone H1.2                                                 | HIST1H1C  | 0.823 | 0.044 | 0.112 |

|             |                                                                   |        |       |       |       |
|-------------|-------------------------------------------------------------------|--------|-------|-------|-------|
| IPI00217519 | Ras-related protein Ral-A precursor                               | RALA   | 1.271 | 0.159 | 0.098 |
| IPI00217563 | Isoform Beta-1A of Integrin beta-1 precursor                      | ITGB1  | 1.317 | 0.095 | 0.029 |
| IPI00217683 | A-kinase anchor protein 12 isoform 2                              | AKAP12 | 0.545 | 0.032 | 0.032 |
| IPI00217966 | Isoform 1 of L-lactate dehydrogenase A chain                      | LDHA   | 0.801 | 0.144 | 0.139 |
| IPI00217975 | Lamin-B1                                                          | LMNB1  | 0.978 | 0.073 | 0.746 |
| IPI00218200 | B-cell receptor-associated protein 31                             | BCAP31 | 1.138 | 0.216 | 0.384 |
| IPI00218319 | Isoform 2 of Tropomyosin alpha-3 chain                            | TPM3   | 0.779 | 0.105 | 0.207 |
| IPI00218323 | Tumor protein D52                                                 | TPD52  | 1.039 | 0.311 | 0.848 |
| IPI00218342 | C-1-tetrahydrofolate synthase. cytoplasmic                        | MTHFD1 | 0.887 | 0.153 | 0.328 |
| IPI00218433 | Cytochrome b-245 light chain                                      | CYBA   | 1.718 | 0.758 | 0.408 |
| IPI00218487 | Gap junction alpha-1 protein                                      | GJA1   | 2.297 | 1.513 | 0.439 |
| IPI00218696 | Isoform 4 of Caldesmon                                            | CALD1  | 2.060 | 0.872 | 0.170 |
| IPI00218782 | Capping protein (Actin filament) muscle Z-line. beta              | CAPZB  | 1.091 | 0.128 | 0.500 |
| IPI00218830 | Isoform Short of Glycylpeptide N-tetradecanoyltransferase 1       | NMT1   | 0.782 | 0.025 | 0.051 |
| IPI00218918 | Annexin A1                                                        | ANXA1  | 1.314 | 0.337 | 0.247 |
| IPI00218924 | Calcium-binding protein p22                                       | CHP    | 1.109 | 0.285 | 0.683 |
| IPI00219005 | FK506-binding protein 4                                           | FKBP4  | 0.694 | 0.358 | 0.439 |
| IPI00219018 | Glyceraldehyde-3-phosphate dehydrogenase                          | GAPDH  | 0.955 | 0.126 | 0.596 |
| IPI00219153 | 60S ribosomal protein L22                                         | RPL22  | 0.965 | 0.038 | 0.417 |
| IPI00219156 | 60S ribosomal protein L30                                         | RPL30  | 0.878 | 0.055 | 0.196 |
| IPI00219217 | L-lactate dehydrogenase B chain                                   | LDHB   | 0.752 | 0.122 | 0.072 |
| IPI00219301 | Myristoylated alanine-rich C-kinase substrate                     | MARCKS | 1.093 | 0.259 | 0.597 |
| IPI00219344 | Hippocalcin-like protein 1                                        | HPCAL1 | 1.429 | 0.276 | 0.115 |
| IPI00219365 | Moesin                                                            | MSN    | 1.294 | 0.196 | 0.122 |
| IPI00219425 | Isoform Beta of Poliovirus receptor precursor                     | PVR    | 1.092 | 0.094 | 0.234 |
| IPI00219525 | 6-phosphogluconate dehydrogenase. decarboxylating                 | PGD    | 0.650 | 0.077 | 0.098 |
| IPI00219678 | Eukaryotic translation initiation factor 2 subunit 1              | EIF2S1 | 0.756 | 0.117 | 0.069 |
| IPI00219682 | Stomatin                                                          | STOM   | 1.615 | 0.043 | 0.002 |
| IPI00219726 | Isoform 2AC of Catenin delta-1                                    | CTNND1 | 1.267 | 0.132 | 0.073 |
| IPI00219757 | Glutathione S-transferase                                         | GSTP1  | 0.719 | 0.098 | 0.154 |
| IPI00219868 | Isoform 1AC of Catenin delta-1                                    | CTNND1 | 1.353 | 0.078 | 0.099 |
| IPI00220113 | Isoform 2 of Microtubule-associated protein 4                     | MAP4   | 0.820 | 0.184 | 0.398 |
| IPI00220194 | Solute carrier family 2. facilitated glucose transporter member 1 | SLC2A1 | 1.328 | 0.073 | 0.016 |
| IPI00220278 | Myosin regulatory light chain 2. smooth muscle isoform            | MYL9   | 1.962 | 0.489 | 0.076 |
| IPI00220301 | Peroxiredoxin-6                                                   | PRDX6  | 0.636 | 0.005 | 0.006 |



|             |                                                                              |         |       |       |       |
|-------------|------------------------------------------------------------------------------|---------|-------|-------|-------|
| IPI00220362 | 10 kDa heat shock protein. mitochondrial                                     | HSPE1   | 1.195 | 0.995 | 0.828 |
| IPI00220487 | Isoform 1 of ATP synthase D chain. mitochondrial                             | ATP5H   | 1.298 | 0.902 | 0.625 |
| IPI00220503 | Dynactin 2                                                                   | DCTN2   | 0.605 | 0.105 | 0.118 |
| IPI00220556 | Pre-B-cell leukemia transcription factor interacting protein 1               | PBXIP1  | 1.149 | 0.018 | 0.054 |
| IPI00220578 | Guanine nucleotide-binding protein G                                         | GNAI3   | 1.762 | 0.071 | 0.003 |
| IPI00220642 | 14-3-3 protein gamma                                                         | YWHAG   | 0.949 | 0.148 | 0.611 |
| IPI00220644 | Isoform M1 of Pyruvate kinase isozymes M1/M2                                 | PKM2    | 0.730 | 0.219 | 0.167 |
| IPI00220709 | Isoform 2 of Tropomyosin beta chain                                          | TPM2    | 0.824 | 0.050 | 0.026 |
| IPI00220739 | Membrane-associated progesterone receptor component 1                        | PGRMC1  | 1.309 | 0.255 | 0.170 |
| IPI00220740 | Isoform 2 of Nucleophosmin                                                   | NPM1    | 1.011 | 0.191 | 0.947 |
| IPI00220991 | Isoform 2 of AP-2 complex subunit beta                                       | AP2B1   | 1.542 | 0.029 | 0.024 |
| IPI00220993 | Isoform CNPI of 2'-3'-cyclic-nucleotide 3'-phosphodiesterase                 | CNP     | 1.851 | 0.427 | 0.217 |
| IPI00221089 | 40S ribosomal protein S13                                                    | RPS13   | 0.721 | 0.151 | 0.233 |
| IPI00221092 | 40S ribosomal protein S16                                                    | RPS16   | 0.776 | 0.067 | 0.028 |
| IPI00221093 | 40S ribosomal protein S17                                                    | RPS17   | 0.911 | 0.034 | 0.170 |
| IPI00221178 | Isoform 2 of Tumor protein D54                                               | TPD52L2 | 1.231 | 0.463 | 0.478 |
| IPI00221209 | Isoform 1 of Syntaxin-2                                                      | STX2    | 1.277 | 0.139 | 0.216 |
| IPI00221222 | Activated RNA polymerase II transcriptional coactivator p15                  | SUB1    | 1.320 | 0.736 | 0.649 |
| IPI00221224 | Aminopeptidase N                                                             | ANPEP   | 1.332 | 0.614 | 0.448 |
| IPI00221232 | Guanine nucleotide-binding protein G(I)/G(S)/G(O) gamma-12 subunit precursor | GNG12   | 1.382 | 0.353 | 0.368 |
| IPI00238262 | Amphoterin-induced protein 2 precursor                                       | AMIGO2  | 0.982 | 0.310 | 0.928 |
| IPI00246058 | PDCD6IP protein                                                              | PDCD6IP | 1.050 | 0.213 | 0.724 |
| IPI00253036 | Isoform I of CD99 antigen precursor                                          | CD99    | 1.253 | 0.145 | 0.094 |
| IPI00289334 | Isoform 1 of Filamin-B                                                       | FLNB    | 1.301 | 0.582 | 0.465 |
| IPI00289499 | Bifunctional purine biosynthesis protein PURH                                | ATIC    | 0.628 | 0.188 | 0.218 |
| IPI00289819 | Cation-independent mannose-6-phosphate receptor precursor                    | IGF2R   | 1.177 | 0.542 | 0.724 |
| IPI00289876 | Isoform 1 of Syntaxin-7                                                      | STX7    | 1.317 | 0.215 | 0.125 |
| IPI00290085 | Cadherin-2 precursor                                                         | CDH2    | 1.361 | 0.183 | 0.076 |
| IPI00290328 | Receptor-type tyrosine-protein phosphatase eta precursor                     | PTPRJ   | 1.378 | 0.265 | 0.132 |
| IPI00290566 | T-complex protein 1 subunit alpha                                            | TCP1    | 0.990 | 0.491 | 0.975 |
| IPI00290770 | Chaperonin containing TCP1. subunit 3 isoform b                              | CCT3    | 1.129 | 0.459 | 0.674 |
| IPI00290928 | Guanine nucleotide-binding protein alpha-13 subunit                          | GNA13   | 1.219 | 0.150 | 0.127 |
| IPI00291006 | Malate dehydrogenase. mitochondrial precursor                                | MDH2    | 0.992 | 0.696 | 0.986 |
| IPI00291032 | Isoform 1 of Sperm antigen with calponin homology and coiled-coil domains 1  | SPECC1  | 1.318 | 0.754 | 0.658 |
| IPI00291175 | Isoform 1 of Vinculin                                                        | VCL     | 0.811 | 0.093 | 0.213 |

|             |                                                                           |           |       |       |       |
|-------------|---------------------------------------------------------------------------|-----------|-------|-------|-------|
| IPI00291262 | Clusterin precursor                                                       | CLU       | 2.005 | 0.481 | 0.208 |
| IPI00291300 | Isoform 2 of Podocalyxin-like protein 2 precursor                         | PODXL2    | 1.532 | 0.073 | 0.062 |
| IPI00291467 | ADP/ATP translocase 3                                                     | SLC25A6   | 1.445 | 1.048 | 0.656 |
| IPI00291802 | Isoform 3 of LIM domain only protein 7                                    | LMO7      | 1.416 | 0.401 | 0.214 |
| IPI00291928 | Ras-related protein Rab-14                                                | RAB14     | 1.197 | 0.279 | 0.346 |
| IPI00292009 | Palladin                                                                  | PALLD     | 1.903 | 0.783 | 0.184 |
| IPI00293073 | Mitochondrial transmembrane GTPase FZO-2                                  | MFN1      | 1.658 | 0.725 | 0.421 |
| IPI00293276 | Macrophage migration inhibitory factor                                    | MIF       | 0.714 | 0.089 | 0.138 |
| IPI00293336 | Similar to metallo-beta-lactamase superfamily protein                     | LOC153364 | 1.205 | 0.374 | 0.581 |
| IPI00293427 | E3 ubiquitin-protein ligase ZNRF2                                         | ZNRF2     | 1.300 | 0.026 | 0.040 |
| IPI00293434 | Signal recognition particle 14 kDa protein                                | SRP14     | 1.025 | 0.166 | 0.816 |
| IPI00295098 | Signal recognition particle receptor subunit beta                         | SRPRB     | 1.073 | 0.215 | 0.716 |
| IPI00295542 | Nucleobindin-1 precursor                                                  | NUCB1     | 1.382 | 0.480 | 0.302 |
| IPI00296053 | Isoform Mitochondrial of Fumarate hydratase. mitochondrial precursor      | FH        | 0.904 | 0.639 | 0.866 |
| IPI00296099 | Thrombospondin-1 precursor                                                | THBS1     | 1.170 | 0.238 | 0.497 |
| IPI00296830 | Isoform 1 of Leucine zipper protein 1                                     | LUZP1     | 1.096 | 0.216 | 0.643 |
| IPI00296992 | AXL receptor tyrosine kinase isoform 1                                    | AXL       | 1.835 | 0.428 | 0.077 |
| IPI00297084 | Dolichyl-diphosphooligosaccharide-protein glycosyltransferase precursor   | DDOST     | 0.967 | 0.162 | 0.759 |
| IPI00297160 | Isoform 12 of CD44 antigen precursor                                      | CD44      | 1.131 | 0.147 | 0.262 |
| IPI00297626 | Syntaxin-binding protein 3                                                | STXBP3    | 1.173 | 0.061 | 0.154 |
| IPI00297646 | Collagen alpha-1(I) chain precursor                                       | COL1A1    | 4.915 | 1.094 | 0.124 |
| IPI00297655 | Neurogenic locus notch homolog protein 2 precursor                        | NOTCH2    | 1.251 | 0.183 | 0.140 |
| IPI00297779 | T-complex protein 1 subunit beta                                          | CCT2      | 1.048 | 0.455 | 0.871 |
| IPI00297910 | Tumor-associated calcium signal transducer 2 precursor                    | TACSTD2   | 1.172 | 0.005 | 0.000 |
| IPI00298057 | Periplakin                                                                | PPL       | 1.381 | 0.199 | 0.080 |
| IPI00298281 | Laminin subunit gamma-1 precursor                                         | LAMC1     | 1.308 | 0.426 | 0.493 |
| IPI00298547 | Protein DJ-1                                                              | PARK7     | 0.650 | 0.062 | 0.079 |
| IPI00298994 | 271 kDa protein                                                           | TLN1      | 1.724 | 0.617 | 0.179 |
| IPI00299000 | Proliferation-associated protein 2G4                                      | PA2G4     | 1.067 | 0.620 | 0.869 |
| IPI00299024 | Brain acid soluble protein 1                                              | BASP1     | 1.230 | 0.170 | 0.144 |
| IPI00299084 | Transmembrane protein 33                                                  | TMEM33    | 0.871 | 0.074 | 0.246 |
| IPI00299088 | Isoform 1 of Brain-specific angiogenesis inhibitor 1-associated protein 2 | BAIAP2    | 1.326 | 0.157 | 0.208 |
| IPI00299116 | Podocalyxin-like protein 1 precursor                                      | PODXL     | 1.215 | 0.527 | 0.553 |
| IPI00299412 | Isoform 2 of CD97 antigen precursor                                       | CD97      | 1.415 | 0.294 | 0.134 |
| IPI00299571 | Isoform 2 of Protein disulfide-isomerase A6 precursor                     | PDIA6     | 1.121 | 0.408 | 0.659 |

|             |                                                                                  |          |       |       |       |
|-------------|----------------------------------------------------------------------------------|----------|-------|-------|-------|
| IPI00299573 | 60S ribosomal protein L7a                                                        | RPL7A    | 0.853 | 0.098 | 0.121 |
| IPI00299594 | Isoform 1 of Neuropilin-1 precursor                                              | NRP1     | 1.425 | 0.235 | 0.089 |
| IPI00300096 | Ras-related protein Rab-35                                                       | RAB35    | 1.269 | 0.054 | 0.090 |
| IPI00300384 | Receptor tyrosine-protein kinase erbB-2 precursor                                | ERBB2    | 1.667 | 0.194 | 0.129 |
| IPI00301023 | Isoform 1 of Paralemmin                                                          | PALM     | 1.273 | 0.640 | 0.655 |
| IPI00301058 | Vasodilator-stimulated phosphoprotein                                            | VASP     | 1.540 | 0.472 | 0.186 |
| IPI00301277 | Heat shock 70 kDa protein 1L                                                     | HSPA1L   | 0.684 | 0.217 | 0.127 |
| IPI00301280 | Transmembrane protein 43                                                         | TMEM43   | 1.085 | 0.089 | 0.404 |
| IPI00302592 | Filamin A, alpha                                                                 | FLNA     | 1.365 | 0.135 | 0.043 |
| IPI00302925 | Chaperonin containing TCP1, subunit 8 (Theta) variant                            | CCT8     | 1.202 | 0.625 | 0.632 |
| IPI00302927 | T-complex protein 1 subunit delta                                                | CCT4     | 1.362 | 0.512 | 0.500 |
| IPI00303300 | FK506-binding protein 10 precursor                                               | FKBP10   | 1.145 | 0.810 | 0.786 |
| IPI00303476 | ATP synthase subunit beta, mitochondrial precursor                               | ATP5B    | 1.435 | 0.791 | 0.442 |
| IPI00303602 | C1orf80 hypothetical protein                                                     | C1orf80  | 2.033 | 0.189 | 0.082 |
| IPI00304589 | 182 kDa tankyrase 1-binding protein                                              | TNKS1BP1 | 0.777 | 0.040 | 0.080 |
| IPI00304612 | 60S ribosomal protein L13a                                                       | RPL13A   | 0.952 | 0.543 | 0.921 |
| IPI00304925 | Heat shock 70 kDa protein 1                                                      | HSPA1B   | 0.820 | 0.321 | 0.574 |
| IPI00305383 | Ubiquinol-cytochrome-c reductase complex core protein 2, mitochondrial precursor | UQCRC2   | 1.359 | 0.892 | 0.670 |
| IPI00305423 | Charged multivesicular body protein 6                                            | CHMP6    | 1.942 | 1.057 | 0.427 |
| IPI00306043 | Isoform 1 of YTH domain family protein 2                                         | YTHDF2   | 0.993 | 0.035 | 0.824 |
| IPI00306048 | Isoform 1 of ATPase family AAA domain-containing protein 3B                      | ATAD3B   | 1.611 | 1.142 | 0.587 |
| IPI00306322 | Collagen alpha-2(IV) chain precursor                                             | COL4A2   | 1.364 | 0.528 | 0.508 |
| IPI00306332 | 60S ribosomal protein L24                                                        | RPL24    | 0.774 | 0.018 | 0.035 |
| IPI00306382 | Isoform 1 of Secretory carrier-associated membrane protein 3                     | SCAMP3   | 1.219 | 0.249 | 0.267 |
| IPI00306604 | Integrin alpha-5 precursor                                                       | ITGA5    | 1.313 | 0.147 | 0.066 |
| IPI00306825 | Isoform 1 of Tumor protein D54                                                   | TPD52L2  | 1.324 | 0.123 | 0.166 |
| IPI00307155 | Rho-associated protein kinase 2                                                  | ROCK2    | 1.679 | 0.612 | 0.195 |
| IPI00307572 | Transmembrane protein 165                                                        | TMEM165  | 1.711 | 0.571 | 0.329 |
| IPI00328180 | Isoform 1 of Ras-related protein Rab-34                                          | RAB34    | 1.111 | 0.022 | 0.089 |
| IPI00328391 | N-acetylgalactosaminyltransferase 7                                              | GALNT7   | 1.479 | 0.572 | 0.447 |
| IPI00328415 | Isoform 1 of NADH-cytochrome b5 reductase                                        | CYB5R3   | 1.244 | 0.071 | 0.128 |
| IPI00328715 | Protein LYRIC                                                                    | MTDH     | 0.844 | 0.066 | 0.055 |
| IPI00328748 | ARMET protein precursor                                                          | ARMET    | 0.791 | 0.019 | 0.041 |
| IPI00328753 | Isoform 1 of Kinectin                                                            | KTN1     | 0.809 | 0.057 | 0.133 |
| IPI00329389 | 60S ribosomal protein L6                                                         | RPL6     | 1.224 | 0.437 | 0.468 |

|             |                                                                          |           |       |       |       |
|-------------|--------------------------------------------------------------------------|-----------|-------|-------|-------|
| IPI00329572 | 49 kDa protein                                                           | PACSIN3   | 1.455 | 0.260 | 0.094 |
| IPI00329672 | Myosin-Ie                                                                | MYO1E     | 2.069 | 0.795 | 0.145 |
| IPI00329801 | Annexin A5                                                               | ANXA5     | 0.836 | 0.074 | 0.062 |
| IPI00332936 | Isoform 2 of Zinc finger CCCH type antiviral protein 1                   | ZC3HAV1   | 0.811 | 0.006 | 0.014 |
| IPI00333068 | Actin-related protein 2/3 complex subunit 1A                             | ARPC1A    | 1.168 | 0.347 | 0.617 |
| IPI00333619 | Isoform 1 of Fatty aldehyde dehydrogenase                                | ALDH3A2   | 0.918 | 0.101 | 0.455 |
| IPI00334190 | Stomatin-like protein 2                                                  | STOML2    | 1.352 | 1.020 | 0.711 |
| IPI00334627 | Similar to annexin A2 isoform 1                                          | ANXA2P2   | 1.279 | 0.218 | 0.157 |
| IPI00334657 | Isoform 1 of Protein YIPF5                                               | YIPF5     | 1.136 | 0.256 | 0.454 |
| IPI00334775 | 85 kDa protein                                                           | HSP90AB1  | 0.651 | 0.166 | 0.206 |
| IPI00335168 | Isoform Non-muscle of Myosin light polypeptide 6                         | MYL6      | 1.556 | 0.180 | 0.033 |
| IPI00337415 | Guanine nucleotide-binding protein G(i), alpha-1 subunit                 | GNAI1     | 1.551 | 0.092 | 0.009 |
| IPI00337495 | Isoform 2 of Procollagen-lysine,2-oxoglutarate 5-dioxygenase 2 precursor | PLOD2     | 0.841 | 0.162 | 0.398 |
| IPI00374054 | Isoform 2 of Protein enabled homolog                                     | ENAH      | 1.689 | 0.191 | 0.123 |
| IPI00376427 | Neural cell adhesion molecule 2 precursor                                | NCAM2     | 1.361 | 0.277 | 0.152 |
| IPI00376798 | Isoform 1 of 60S ribosomal protein L11                                   | RPL11     | 0.824 | 0.130 | 0.144 |
| IPI00383071 | LOC729708 RcTP11 (Fragment)                                              | LOC729708 | 0.887 | 0.412 | 0.764 |
| IPI00383581 | Isoform 1 of Neutral alpha-glucosidase AB precursor                      | GANAB     | 0.819 | 0.024 | 0.006 |
| IPI00383645 | CGI-151 protein                                                          | PALLD     | 1.473 | 0.290 | 0.261 |
| IPI00383680 | Ribophorin II                                                            | RPN2      | 0.928 | 0.166 | 0.649 |
| IPI00383751 | CALCIUM binding protein (Fragment)                                       | CALRET    | 1.226 | 0.264 | 0.439 |
| IPI00385034 | Isoform 1 of Na(+)/H(+) exchange regulatory cofactor NHE-RF2             | SLC9A3R2  | 1.116 | 0.157 | 0.330 |
| IPI00385318 | Isoform 5 of Myoferlin                                                   | FER1L3    | 0.931 | 0.239 | 0.755 |
| IPI00385449 | Protein kinase C alpha type                                              | PRKCA     | 1.192 | 0.031 | 0.009 |
| IPI00386755 | ERO1-like protein alpha precursor                                        | ERO1L     | 0.950 | 0.118 | 0.658 |
| IPI00387144 | Tubulin alpha-ubiquitous chain                                           | TUBA1B    | 0.672 | 0.000 | 0.000 |
| IPI00395488 | Vasorin precursor                                                        | VASN      | 1.542 | 0.525 | 0.382 |
| IPI00395887 | Thioredoxin domain-containing protein 1 precursor                        | TXNDC1    | 1.244 | 0.088 | 0.160 |
| IPI00395906 | Similar to RIKEN cDNA 2310002J15 gene                                    | MGC59937  | 1.450 | 0.137 | 0.135 |
| IPI00396321 | Leucine-rich repeat-containing protein 59                                | LRRC59    | 0.897 | 0.093 | 0.195 |
| IPI00396378 | Isoform B1 of Heterogeneous nuclear ribonucleoproteins A2/B1             | HNRPA2B1  | 0.777 | 0.164 | 0.143 |
| IPI00396485 | Elongation factor 1-alpha 1                                              | EEF1A1    | 0.729 | 0.021 | 0.035 |
| IPI00397949 | G protein-coupled receptor 56 isoform b                                  | GPR56     | 2.194 | 0.075 | 0.028 |
| IPI00398435 | similar to Plexin-B2 precursor                                           | PLXNB2    | 1.313 | 0.034 | 0.049 |
| IPI00398775 | Plectin 1 isoform 2                                                      | PLEC1     | 0.775 | 0.169 | 0.148 |

|             |                                                                               |         |       |       |       |
|-------------|-------------------------------------------------------------------------------|---------|-------|-------|-------|
| IPI00398779 | Isoform 4 of Plectin-1                                                        | PLEC1   | 0.747 | 0.184 | 0.302 |
| IPI00399089 | Mesoderm development candidate 2                                              | MESDC2  | 0.898 | 0.052 | 0.220 |
| IPI00401264 | Thioredoxin domain-containing protein 4 precursor                             | TXNDC4  | 1.057 | 0.183 | 0.645 |
| IPI00401791 | IKIP2                                                                         | IKIP    | 0.675 | 0.065 | 0.090 |
| IPI00402183 | Isoform 3 of Heterogeneous nuclear ribonucleoprotein Q                        | SYNCRIP | 0.846 | 0.068 | 0.192 |
| IPI00409635 | Isoform 2 of Protein FAM62B                                                   | FAM62B  | 1.548 | 0.326 | 0.100 |
| IPI00410034 | Solute carrier family 38 member 2                                             | SLC38A2 | 0.225 | 0.016 | 0.010 |
| IPI00410666 | Isoform 3 of Protein LAP4                                                     | SCRIB   | 1.353 | 0.190 | 0.084 |
| IPI00410693 | Isoform 1 of Plasminogen activator inhibitor 1 RNA-binding protein            | SERBP1  | 0.631 | 0.078 | 0.094 |
| IPI00412579 | 60S ribosomal protein L10a                                                    | RPL10A  | 0.841 | 0.106 | 0.280 |
| IPI00412714 | Isoform 4 of Plasminogen activator inhibitor 1 RNA-binding protein            | SERBP1  | 0.773 | 0.126 | 0.238 |
| IPI00413108 | Ribosomal protein SA                                                          | RPSA    | 0.653 | 0.070 | 0.013 |
| IPI00414005 | Isoform Short of Sodium/potassium-transporting ATPase alpha-1 chain precursor | ATP1A1  | 1.275 | 0.024 | 0.040 |
| IPI00414320 | Annexin A11                                                                   | ANXA11  | 1.409 | 0.060 | 0.007 |
| IPI00414554 | Actin-related protein 2/3 complex subunit 5-like protein                      | ARPC5L  | 1.216 | 0.238 | 0.422 |
| IPI00418169 | Annexin A2 isoform 1                                                          | ANXA2   | 1.312 | 0.106 | 0.037 |
| IPI00418262 | Fructose-bisphosphate aldolase C                                              | ALDOC   | 0.932 | 0.343 | 0.826 |
| IPI00418471 | Vimentin                                                                      | VIM     | 0.678 | 0.049 | 0.008 |
| IPI00419373 | Isoform 1 of Heterogeneous nuclear ribonucleoprotein A3                       | HNRPA3  | 0.810 | 0.349 | 0.445 |
| IPI00419473 | Isoform 2 of Transcription factor BTF3                                        | BTF3    | 0.736 | 0.016 | 0.027 |
| IPI00419585 | Peptidyl-prolyl cis-trans isomerase A                                         | PPIA    | 0.953 | 0.136 | 0.611 |
| IPI00419880 | 40S ribosomal protein S3a                                                     | RPS3A   | 0.716 | 0.123 | 0.057 |
| IPI00423570 | Isoform 2B of GTPase KRas precursor                                           | KRAS    | 1.364 | 0.161 | 0.059 |
| IPI00425562 | Isoform 2 of Protein LAP4                                                     | SCRIB   | 1.523 | 0.062 | 0.053 |
| IPI00432363 | Microtubule-actin cross-linking factor 1. isoform 4                           | MACF1   | 1.366 | 0.067 | 0.083 |
| IPI00438286 | Isoform 1 of Protein LAP2                                                     | ERBB2IP | 1.603 | 0.067 | 0.050 |
| IPI00439415 | Eukaryotic translation initiation factor 4B                                   | EIF4B   | 0.828 | 0.093 | 0.233 |
| IPI00440493 | ATP synthase subunit alpha. mitochondrial precursor                           | ATP5A1  | 1.372 | 0.725 | 0.467 |
| IPI00440932 | Isoform 1 of ADAM 9 precursor                                                 | ADAM9   | 1.750 | 0.087 | 0.052 |
| IPI00441498 | Folate receptor alpha precursor                                               | FOLR1   | 1.507 | 0.213 | 0.054 |
| IPI00442073 | Cysteine and glycine-rich protein 1                                           | CSRP1   | 1.563 | 0.389 | 0.129 |
| IPI00443909 | Isoform 1 of MIR-interacting saposin-like protein precursor                   | TMEM4   | 0.833 | 0.052 | 0.137 |
| IPI00444262 | FLJ45706 fis. clone FEBRA2028457. highly similar to Nucleolin                 | NCL     | 0.906 | 0.243 | 0.682 |
| IPI00453116 | Secretory carrier membrane protein 3 isoform 1                                | SCAMP3  | 1.110 | 0.220 | 0.608 |
| IPI00456750 | Niban-like protein                                                            | FAM129B | 1.657 | 0.257 | 0.172 |

|             |                                                                       |               |       |       |       |
|-------------|-----------------------------------------------------------------------|---------------|-------|-------|-------|
| IPI00456925 | Isoform 1 of Drebrin-like protein                                     | DBNL          | 1.549 | 0.494 | 0.361 |
| IPI00464981 | Isoform 1 of Protein ITFG3                                            | ITFG3         | 1.899 | 0.088 | 0.044 |
| IPI00465028 | Triosephosphate isomerase 1 variant                                   | TPI1          | 0.677 | 0.126 | 0.171 |
| IPI00465071 | TBC domain containing protein 10B                                     | TBC1D10B      | 2.268 | 0.017 | 0.006 |
| IPI00465121 | Galphai2 protein                                                      | GNAI2         | 1.632 | 0.331 | 0.080 |
| IPI00465248 | Isoform alpha-enolase of Alpha-enolase                                | ENO1          | 0.847 | 0.203 | 0.322 |
| IPI00465361 | 60S ribosomal protein L13                                             | RPL13         | 0.849 | 0.112 | 0.145 |
| IPI00465431 | Galectin-3                                                            | LGALS3        | 1.170 | 0.130 | 0.315 |
| IPI00465436 | Catalase                                                              | CAT           | 0.960 | 0.561 | 0.937 |
| IPI00465439 | Fructose-bisphosphate aldolase A                                      | ALDOA         | 1.030 | 0.313 | 0.883 |
| IPI00470360 | Isoform 1 of Kin of IRRE-like protein 1 precursor                     | KIRREL        | 0.990 | 0.143 | 0.916 |
| IPI00470467 | NADPH--cytochrome P450 reductase                                      | POR           | 0.866 | 0.144 | 0.413 |
| IPI00470468 | Isoform 3 of Protein EFR3-like                                        | KIAA0143      | 1.444 | 0.150 | 0.149 |
| IPI00470535 | Dihydropyridine receptor alpha 2 subunit                              | CACNA2D1      | 1.425 | 0.388 | 0.199 |
| IPI00472102 | 61 kDa protein                                                        | HSPD1         | 0.530 | 0.071 | 0.068 |
| IPI00472164 | Wiskott-Aldrich syndrome protein family member 2                      | WASF2         | 1.078 | 0.140 | 0.578 |
| IPI00472882 | HLA class I histocompatibility antigen. A-68 alpha chain precursor    | HLA-A         | 1.469 | 0.502 | 0.247 |
| IPI00477611 | 184 kDa protein                                                       | COL5A1        | 7.188 | 6.860 | 0.423 |
| IPI00478292 | 285 kDa protein                                                       | SPTAN1        | 1.099 | 0.085 | 0.349 |
| IPI00479186 | Isoform M2 of Pyruvate kinase isozymes M1/M2                          | PKM2          | 0.654 | 0.107 | 0.136 |
| IPI00479767 | Similar to AHNAK nucleoprotein isoform 1                              | AHNAK2        | 0.862 | 0.067 | 0.211 |
| IPI00479905 | NADH dehydrogenase [ubiquinone] 1 beta subcomplex subunit 10          | NDUFB10       | 1.198 | 0.651 | 0.742 |
| IPI00479997 | Stathmin                                                              | STMN1         | 0.652 | 0.082 | 0.018 |
| IPI00480022 | Isoform 1 of Golgin subfamily A member 7                              | GOLGA7        | 1.204 | 0.249 | 0.454 |
| IPI00549343 | Vesicle-associated membrane protein 3                                 | VAMP3         | 1.353 | 0.157 | 0.194 |
| IPI00550021 | 60S ribosomal protein L3                                              | RPL3          | 0.862 | 0.168 | 0.453 |
| IPI00550181 | Charged multivesicular body protein 2b                                | CHMP2B        | 1.132 | 0.172 | 0.474 |
| IPI00550234 | Isoform 1 of Actin-related protein 2/3 complex subunit 5              | ARPC5         | 1.416 | 0.036 | 0.039 |
| IPI00550363 | Transgelin-2                                                          | TAGLN2        | 1.607 | 0.209 | 0.038 |
| IPI00550451 | Serine/threonine-protein phosphatase PP1-alpha catalytic subunit      | PPP1CA        | 1.174 | 0.102 | 0.249 |
| IPI00550523 | Hypothetical protein LOC25923                                         | DKFZP564J0863 | 1.105 | 0.288 | 0.697 |
| IPI00550746 | Nuclear migration protein nudC                                        | NUDC          | 0.623 | 0.276 | 0.304 |
| IPI00552587 | Growth arrest and DNA-damage-inducible proteins-interacting protein 1 | GADD45GIP1    | 1.502 | 1.375 | 0.697 |
| IPI00553138 | Vesicle-associated membrane protein 2                                 | VAMP2         | 1.124 | 0.364 | 0.713 |
| IPI00554521 | Ferritin heavy chain                                                  | FTH1          | 1.567 | 0.042 | 0.033 |

|             |                                                                                   |           |       |       |       |
|-------------|-----------------------------------------------------------------------------------|-----------|-------|-------|-------|
| IPI00554711 | Junction plakoglobin                                                              | JUP       | 1.068 | 0.037 | 0.234 |
| IPI00554737 | Serine/threonine-protein phosphatase 2A 65 kDa regulatory subunit A alpha isoform | PPP2R1A   | 0.681 | 0.035 | 0.049 |
| IPI00554788 | 49 kDa protein                                                                    | KRT18     | 1.157 | 0.346 | 0.515 |
| IPI00554811 | Actin-related protein 2/3 complex subunit 4                                       | ARPC4     | 1.541 | 0.165 | 0.135 |
| IPI00555610 | 313 kDa protein                                                                   | AHNAK     | 1.087 | 0.150 | 0.562 |
| IPI00556619 | TXNDC14 protein                                                                   | TXNDC14   | 1.074 | 0.070 | 0.376 |
| IPI00604620 | Isoform 1 of Nucleolin                                                            | NCL       | 1.122 | 0.217 | 0.571 |
| IPI00641181 | MARCKS-related protein                                                            | MARCKSL1  | 1.498 | 0.264 | 0.082 |
| IPI00643041 | GTP-binding nuclear protein Ran                                                   | RAN       | 0.764 | 0.450 | 0.594 |
| IPI00643920 | Transketolase                                                                     | TKT       | 1.050 | 0.139 | 0.598 |
| IPI00644079 | Heterogeneous nuclear ribonucleoprotein U isoform a                               | HNRPU     | 0.990 | 0.113 | 0.922 |
| IPI00644618 | Isoform 4 of Myelin protein zero-like protein 1 precursor                         | MPZL1     | 1.307 | 0.085 | 0.124 |
| IPI00645078 | Ubiquitin-activating enzyme E1                                                    | UBE1      | 0.749 | 0.009 | 0.016 |
| IPI00645194 | Integrin, beta 1                                                                  | ITGB1     | 1.402 | 0.155 | 0.046 |
| IPI00645815 | Solute carrier family 9 isoform 3 regulator 2                                     | SLC9A3R2  | 1.204 | 0.104 | 0.077 |
| IPI00646083 | HLA class I histocompatibility antigen, B-15 alpha chain precursor                | LOC730410 | 1.422 | 0.396 | 0.206 |
| IPI00646304 | Peptidylprolyl isomerase B precursor                                              | PPIB      | 0.873 | 0.047 | 0.043 |
| IPI00654623 | Tumor endothelial marker 6                                                        | TNS3      | 1.879 | 1.215 | 0.493 |
| IPI00742780 | FLJ00279 protein (Fragment)                                                       | MYH9      | 1.370 | 0.036 | 0.043 |
| IPI00742905 | 146 kDa protein                                                                   | DHX9      | 1.271 | 0.195 | 0.300 |
| IPI00743335 | Myosin IC isoform a                                                               | MYO1C     | 1.475 | 0.350 | 0.306 |
| IPI00743716 | HLA class I histocompatibility antigen, Cw-12 alpha chain precursor               | LOC730410 | 1.410 | 0.395 | 0.214 |
| IPI00746388 | Villin 2                                                                          | VIL2      | 1.393 | 0.315 | 0.163 |
| IPI00747849 | Isoform 2 of Sodium/potassium-transporting ATPase subunit beta-1                  | ATP1B1    | 1.081 | 0.236 | 0.612 |
| IPI00748145 | Isoform 1 of Guanine nucleotide-binding protein G(i). alpha-2 subunit             | GNAI2     | 1.684 | 0.247 | 0.159 |
| IPI00760554 | HLA class I histocompatibility antigen, A-69 alpha chain                          | HLA-A     | 1.248 | 0.346 | 0.496 |
| IPI00784154 | 60 kDa heat shock protein, mitochondrial precursor                                | HSPD1     | 1.108 | 0.899 | 0.893 |
| IPI00787853 | Inositol monophosphatase domain-containing protein 1                              | IMPAD1    | 1.648 | 0.468 | 0.139 |
| IPI00789324 | JUP protein                                                                       | JUP       | 1.413 | 0.239 | 0.096 |
| IPI00790010 | GULP, engulfment adaptor PTB domain containing 1                                  | GULP1     | 1.503 | 0.019 | 0.017 |
| IPI00793199 | Annexin IV                                                                        | ANXA4     | 1.149 | 0.068 | 0.199 |
| IPI00794397 | Chromatin modifying protein 4A                                                    | CHMP4A    | 0.576 | 0.391 | 0.367 |
| IPI00797154 | 25 kDa protein                                                                    | SLC9A3R2  | 0.877 | 0.061 | 0.214 |
| IPI00797556 | 24 kDa protein                                                                    | ANXA2     | 1.257 | 0.180 | 0.131 |
| IPI00844215 | Isoform 1 of Spectrin alpha chain, brain                                          | SPTAN1    | 1.414 | 0.075 | 0.081 |

|             |                                |       |       |       |       |
|-------------|--------------------------------|-------|-------|-------|-------|
| IPI00844475 | MHC class I antigen (Fragment) | HLA-A | 1.716 | 0.331 | 0.201 |
|-------------|--------------------------------|-------|-------|-------|-------|

---

<sup>a</sup> Mean ratio is the average ratio of the three independent experiments

<sup>b</sup> Stdev (ratio) is the standard error of the mean ratio
